# Supplementary material for: Control of somatic tissue differentiation by the long non-coding RNA TINCR
Source: Springer Nature journal article supplement (doi:10.1038/nature11661), 2012-12-02
Supplement: 41586_2013_BFnature11661_MOESM10_ESM.pdf [file 41586_2013_BFnature11661_MOESM10_ESM.pdf]

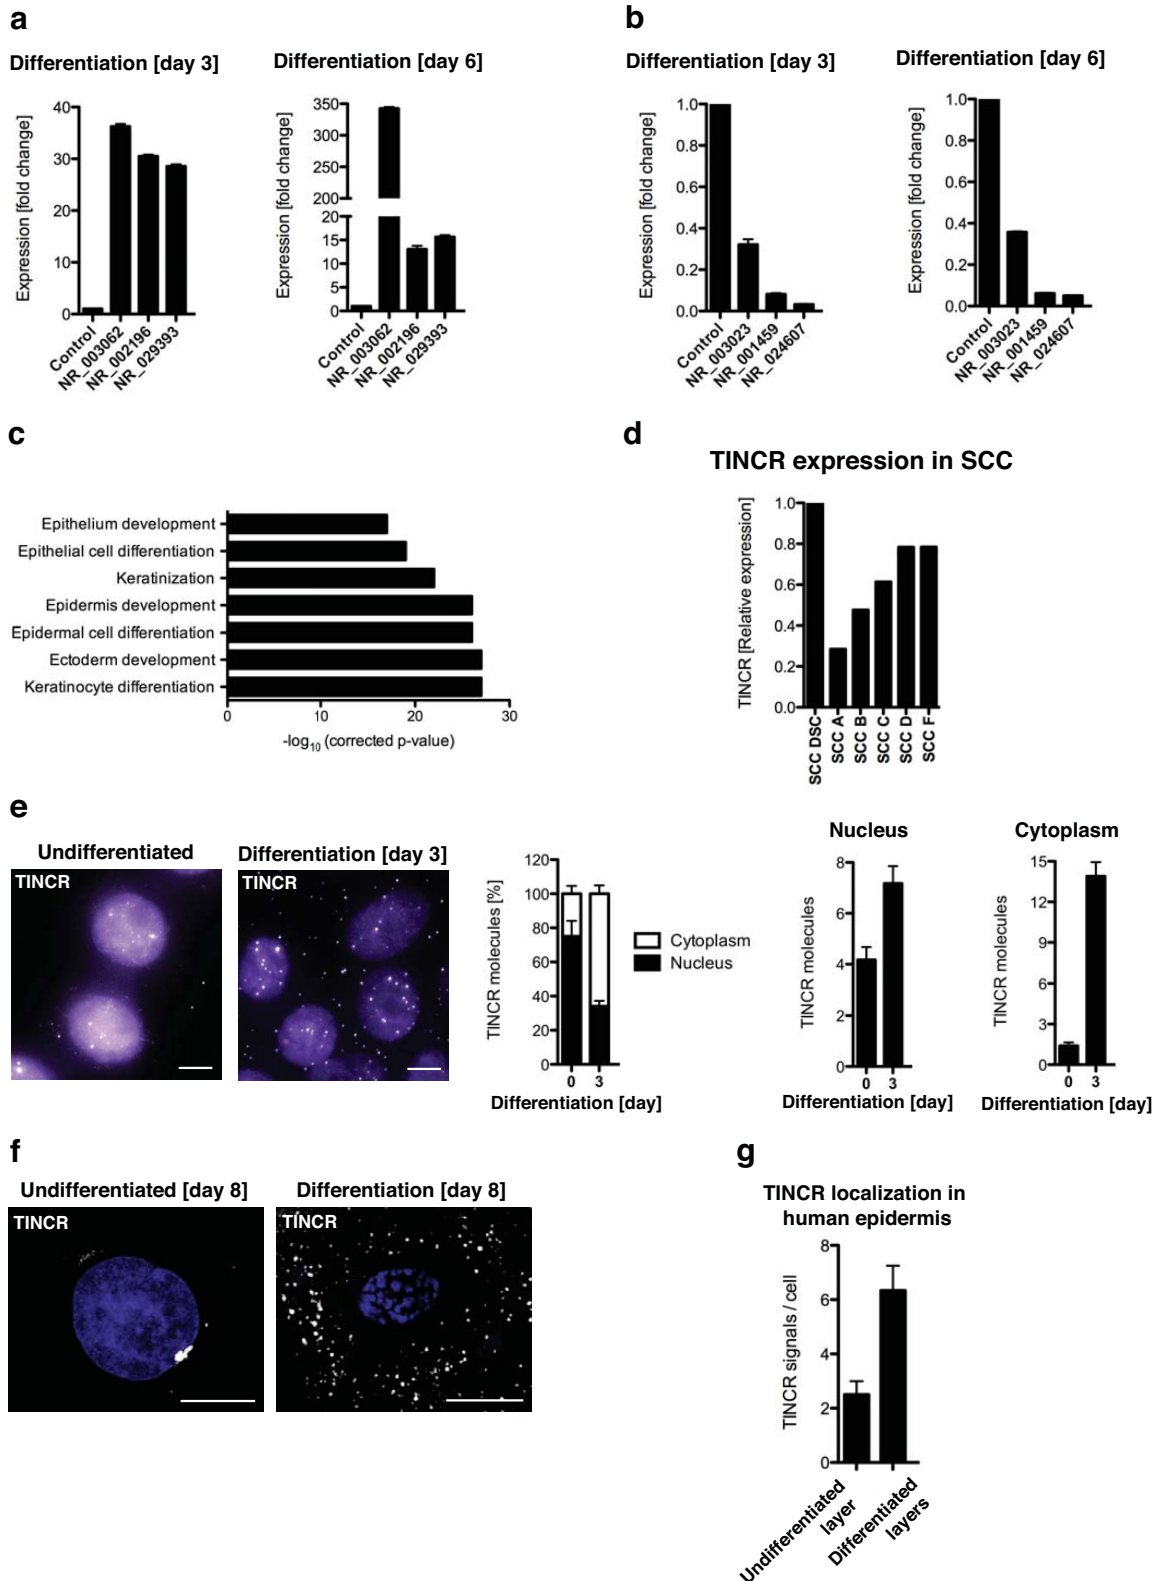

**Fig. S1.** TINCR is induced during differentiation. 6 out of the top 15 differentially expressed noncoding RNAs from the transcriptome sequencing analysis were randomly selected and tested by qRT-PCR. Concordant changes in expression levels at days 3

and 6 of differentiation were observed for all **(a)** up- and **(b)** downregulated transcripts. Data are shown with s.d.m (n=4). **(c)** Gene ontology terms significantly enriched in the day 3 and day 6 altered transcriptome sequencing gene subset. **(d)** qRT-PCR analyses showed reduction of TINCR transcript abundance in human squamous cell carcinoma (SCC) specimens, compared to site-matched controls. **(e)** Single molecule RNA fluorescence in situ hybridization (FISH); graph (left) shows average percent of TINCR in the nucleus and cytoplasm. The two graphs on the right show the number of TINCR molecules in nucleus and cytoplasm. TINCR [white], Dapi [blue], scale bar=5 $\mu$ m. **(f)** Single molecule RNA fluorescence in situ hybridization (FISH) showing greatly increased abundance of TINCR molecules at late differentiation timepoint (day 8) compared to undifferentiated keratinocytes cultured for the same amount of time. TINCR [white], Dapi [blue], scale bar=7 $\mu$ m. **(g)** Single molecule RNA FISH showing significant enrichment of TINCR molecules in differentiated layers of human epidermis.

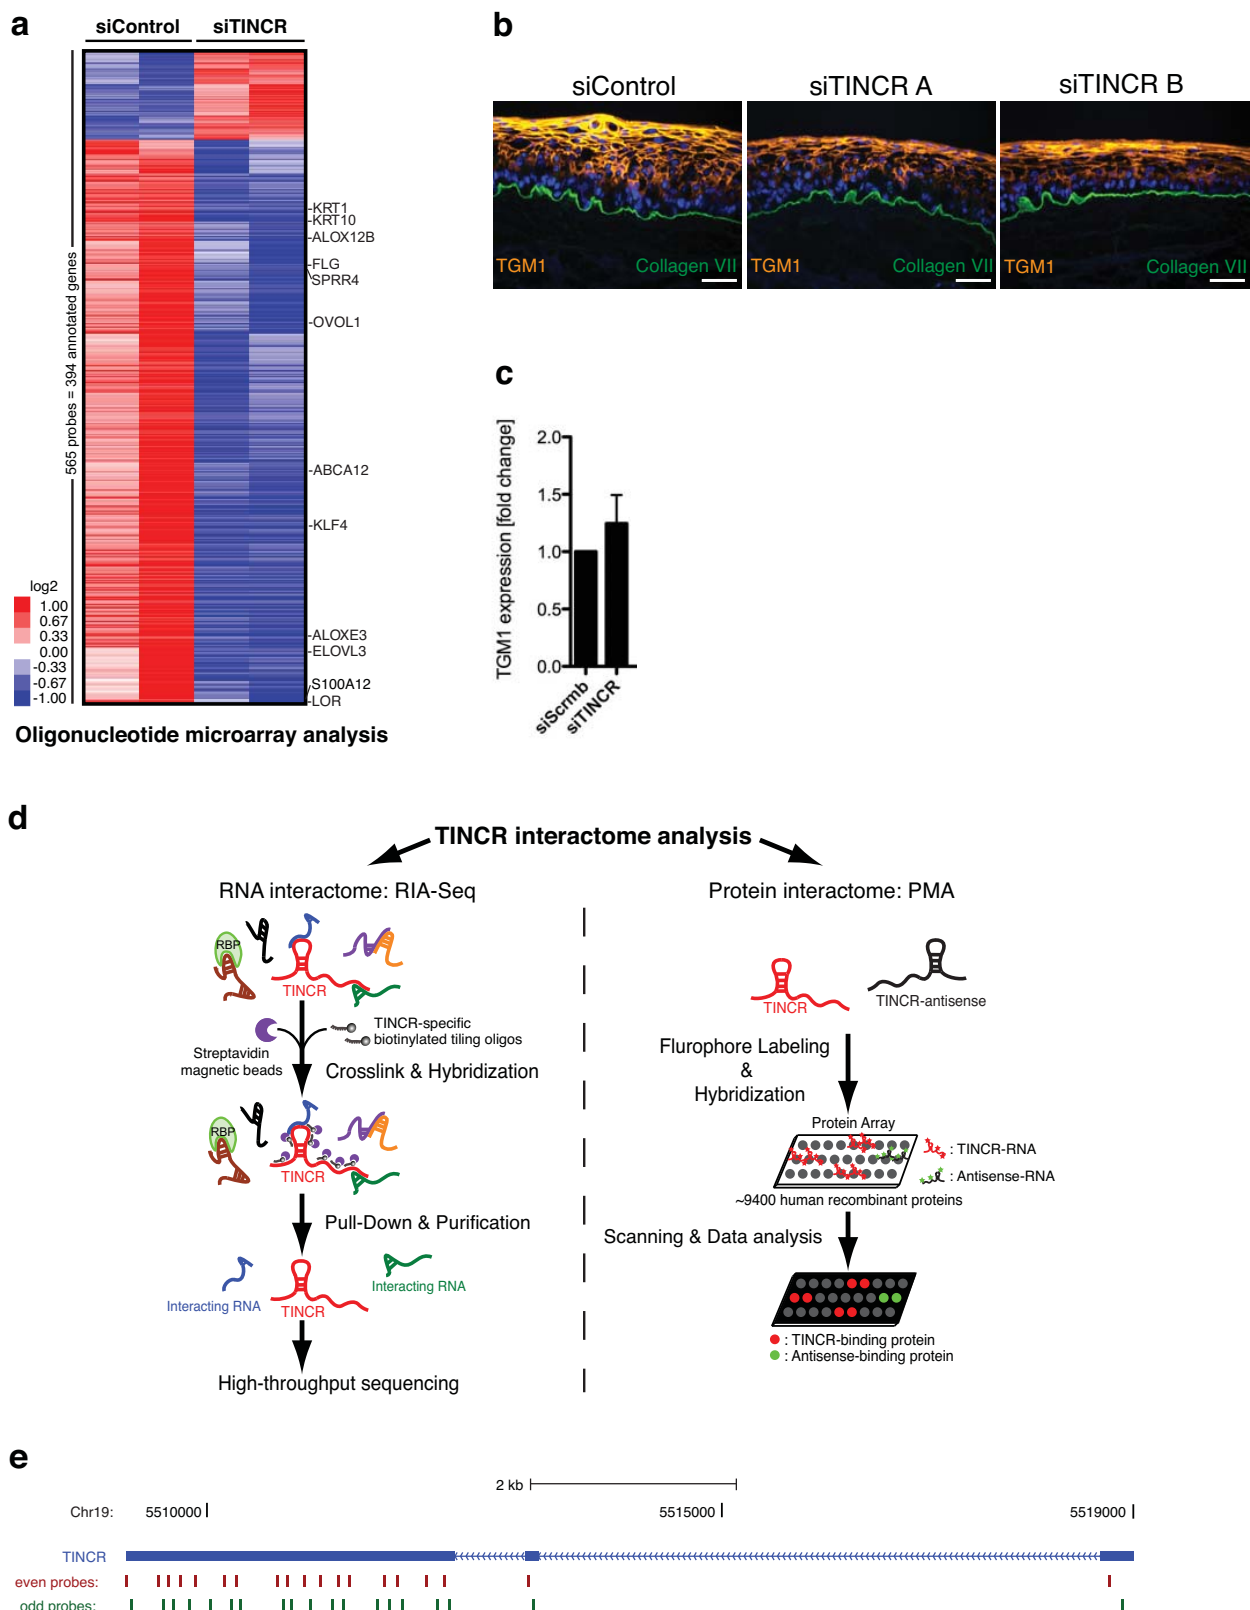

**Fig. S2.** TINCR regulates differentiation gene expression. **(a)** Heat map depicting transcript profiling of independent biologic replicate organotypic epidermal tissues with siRNA-mediated TINCR depletion versus control siRNA. Expression changes for each

probe are normalized to mean centered signal across all samples. **(b)** Differentiation protein TGM1 in TINCR-depleted organotypic human epidermis via independent TINCR siRNAs [A and B] versus scrambled control; differentiation proteins detected by immunofluorescence in orange, basement membrane collagen VII [green], nuclear Hoechst 33342 [blue], scale bar=50 $\mu$ m. **(c)** mRNA expression in tissue as a function of TINCR loss for transglutaminase1 (TGM1). Data represent independent biologic replicates for duplicate independent TINCR siRNAs. **(d)** Schematic depicting high-throughput assays to analyze the TINCR protein- and RNA-interactome. RIA-Seq, RNA interactome analysis with high throughput sequencing (left side); PMA, Protein microarray (right side). **(e)** Location of the two independent “even” and “odd” probe sets used for the RIA TINCR pull-down. RBP, RNA binding protein.

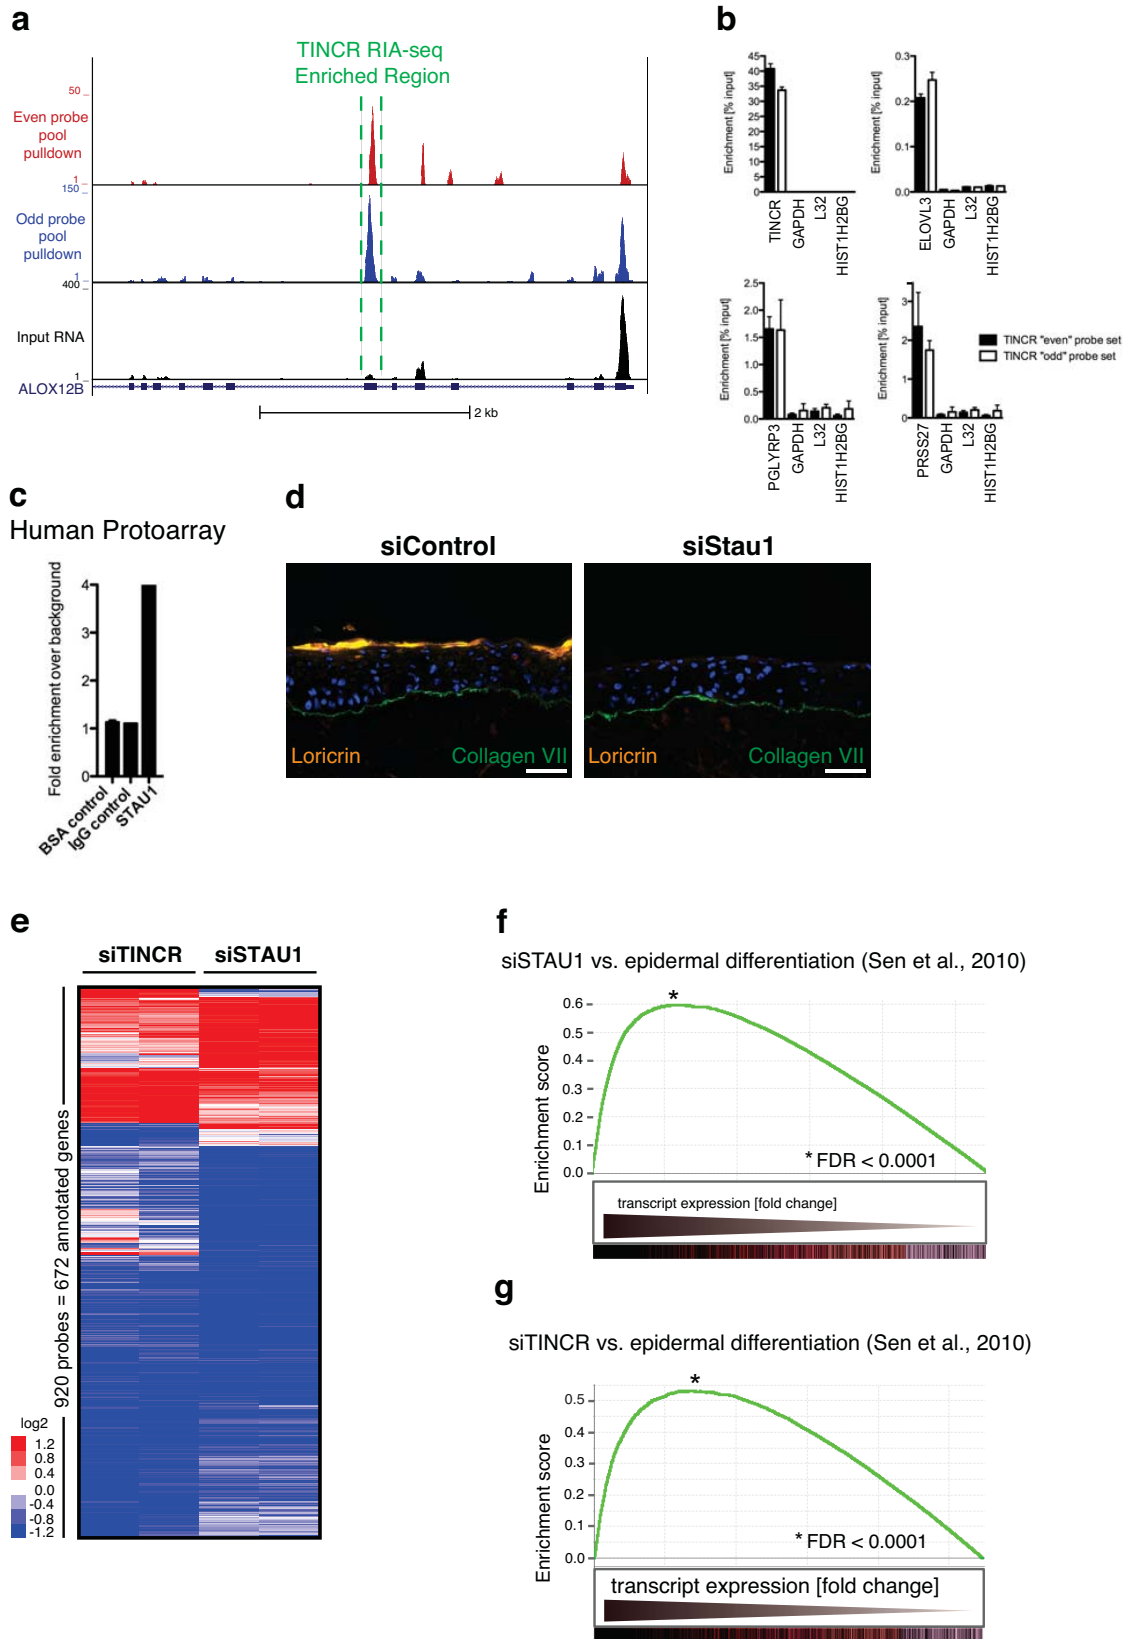

**Fig. S3.** TINCR interacts with differentiation gene mRNAs and STAU1 protein. (a) Schematic of the RIA-Seq data analysis procedure. Sequencing reads were mapped and detection of enriched sites in the “even” and “odd” samples compared to input

control was performed by scanning each gene using 100 nucleotide sliding windows. This resulted in a total of 3602 TINCR-enriched sites throughout the transcriptome. Depicted here is the ALOX12B locus. **(b)** RNA interactome analysis (RIA)-qRT-PCR of the ELOVL3, PGLYRP3, and PRSS27 epidermal differentiation mRNAs as well as the GAPDH, L32 and HIST1H2BG mRNA controls. Data are shown with s.d.m (n=4). **(c)** Quantified hybridization signal of TINCR protein microarray analysis shown with respect to adjacent protein controls in the same subarray. **(d)** Defective induction of the loricrin differentiation protein in STAU1-deficient tissue; scale bar=50 $\mu$ m. **(e)** Heat map depicting transcript profiling of independent biologic replicate organotypic epidermal tissues with siRNA-mediated TINCR- or STAU1-depletion versus control siRNA. Expression changes for each probe are normalized to mean centered signal across all samples. 920 probes passed the filtering criteria of a SAM-FDR < 0.05 and >2-fold change in signal intensity in siControl versus siTINCR or siSTAU1 samples. **(f)** Gene set enrichment analysis (GSEA) shows highly statistically significant overlap of the STAU1i as well as the TINCRi gene set **(g)** with a calcium-induced keratinocyte differentiation gene signature published previously<sup>7</sup>.

Antisense TINCR motif boxes – Yellow  
 Sense TINCR motif boxes – Blue  
 Probes for TINCR RIA-Seq – Red  
 Overlap of motif boxes and probes – Green

```

>TINCR_sequence
GCTAGTCGGGCGGGTGC GCGGGGGCGCTCGGGGCCGGGCCAGAGCTGGAGCCGGAGCCGGGGCG
GGCGC CATGGAGGGGCTGCGGGGGGGCTGTCGCGCTGGAAGCGCTACCACATCAA GGTGCACCTG
GCGGACGAGGGCGCTGCTGCTACCGCTGACCGTGC GGGCCGCGGGACACGCTCAGCGACCTGCGCGCC
CAGCTGGTGGGCCAGGGCGTGAGCTCCTGG AAGCGCGCCTTCTACTACAA CGCGCGCGGGCTGGAC
GACCACAGACGGTGC GCGACGCGCGCCTGCAGAACGGCTCGGTGCTGCTGCTCAGCGACCC
AGGTAGTCTGGTTGAGAGGAGCAGGCCATGACCAAGGGGACC TGGTACTGGTGAAGGAATAGG
CTGGGGTAGAGGGCACT TTTGGAAGGCACTTCTCCTG CCTCCCGGAGCCTAGATCTCACTCCAGGGT
CTGGGCTCCAGGTGGACCATGAAACCCTGGCCTGACC AGCTGATGCACACTGCTTCA GACACTCCTG
CTGGAGCCCCAGTCCC TGACAAGGACCTAGGACATT TTTGCTCCTGCCAGCCTATCGGGAGGGAGC
CTTGAGCCTTTTCAGCTC TGCTGTGTGACTTTGAGGT GTTGCTCCCCTTTGGGGCCCTGGTGCCT
GTCTTCAGTGGAAGCACTGTGCCACCTTGAAAGCTCCCATGGGCAGCCAGAGGGC ATCGCAAGAA
GAGAAGCACA GAAGGGGCAGGAGAGACAC TCAGAGGCACTTCCGCTCTTGCCAGGACATTTTCCA
GCCACACCTTTGCCAAGCCGTGCCCCCTGCCTGGAGCACTTTTCAACCTTCTCTGCAGCTCCAATA
CACCTGGGATTGCAGTCTCCTCCAGGAAGTCTTCTCAGATTCCCTCCTTCCAGCCAGAGAGCACCTA
GCCTTTTGGGGCCCCACAGGCC TTTGTGCAGTGAACAGCCCT GGCTGGGGGTGCAGCCAGTCCG
TG TCCGAACCTCCAATGACTA AGCGGGGAGATGCGGACATCCTAGCTCCTTCTCAGCCCTCCAAC TG
TGCCCC ATTTCCACCCCCAAATACCT CCCAGGAGGCACCTGTGCCACCCCTGGGCTG TTTCCCC
TTCCCTTAAAT CCGGATGCCTCGTCTTGCATAGGGTCTTGGGGCAGCGGGG AAGGGGTTCTGAAGAA
CTCT GGCCAAGAGGACGAGGATCTGGGGGTGGGGAATGGGCTAGCTGTGGGAGGTATCGCGGG
GCATTGCAGGGAGTGC GTTGTGGAATTCGGGTGGAGACCCCTCAGGGCAGTGTGCCGGCCTCCGT
TGCACCTCTGACCTGCAGCCACATCGTTGCGAGCCCTGCGGAGGGTCTTTGGGAGGGGGTG
CCGAGGCTACGCATGTCTCGAGGGCCGTGTACACTCTCCAGGCACCATGGGCGGAGGGCG CAGAG
GCTGGGAAGAAATAA TGTTTTAGTTAAGAGTCTGTTGGCTGCAGGACTCAGAG CATGGACAGGTGGA
TAGTAA ATCACCACCACGGGACAGCCGTGC CCAGACTGTGCGTTTGCTTA GCTCGGGGACAGCACTT
GGCCGGGGTCTCCTGCTCGCCTCCC TCAGAGCATCTGCCAAACTTCGGGCATCTACCTGCAATTC
CCGCTTGGCTGAGAGGAGGGGGA GAAGGAGGGGAAGAGAGAGGAGGCC CACTTCACTCCGGCAGGC
AGACCTGCTGG AGCTGCTTGCAGAATGACT TGGGTCTTGTGGCCCTGGGTGTGCTGGAGGGGG
GTCTTCTC ATCCCCCTCCACCTCTCCCTTGGT GCCTAACCCAGGACTTTGT CCCCAGAGACCCACTGT
GTGCCCTGGAGCTCCTCCTAGAGC AGAGTCTGCTGCTGTCTGTT CTGCAGAGGGTAGCCTGAGGC
CCAAGGAGTTGT CAGGGACACACAGCAGGGGGAGGCAGCCAGATCCCTGCTCATGCGTGGTTTG
GCCTCTGCTAACAGCTGG GCCACATGCGTGTATCTAGA GCCTGGGTCCCCTCTGCCTCA TTTCCCTGT
GCATATTCAGG GACATGCCTCGTCAGGGTTT GGCAAGAAAATGGGGCATT AATAATCTCCCAGTTTC
ATTCCTTGGTCTTACTCCATGC CAGGACTTGTGCACATCTTT TGGAGCCCTGTCTCATTGATTGACA
GCCCGGCGGCGGGTGGCTCACGCCGTGTAATCCAGCACTTTGGGAGGACGAGCCAGGCGGATCA
TGAGGTCAGGAGATGGAGACCATCCTGGCTAACACGGTGAAACCCCGTCTCTACTAAAAGTACAAAA
AAATAGCCGGGCCTGGTGGCGGGCGCCTGTAGTCCAGCTACTTGGTAGGCTGAGGCAGGAGAATGG
CGGAACCCGGGAGGCAGAGGTTGCAGTGAGCTGAGATCACGCCACTGCACTCCAGCCTGGCGCAC
AGAGCGAGACTCCGTCTCAAAAAAAAAAAAAAAAAAAGA TTGACAGCCTCACTGCTCAG GGGCCAGGAT
AACAGCCAT TTTACAGATGGCTTTTGGCT TGCCAAAGTCAACCCCTC TGAAGTGAGGCGTCCCCAA
CCCATGCCGGGAGCT GGTGGAGGAAGTGGGGAAGGTTTC CCGCTTCTCCACTGGGGGTG GAGGTG
GGAGAAAGCATTT CAGGGTGTGTTT GACATTTAACAAACAGTATGCAAATCACATGCAAATCGCATGCAA
ATCACCACCCATTTCTTAAGCCTCGACAGCGCTGGCATGTTCTGAAAT AATAATGTTGGACCTGTCCC TT
GATGATGACCTGGGTCGGGAGGTGCACGGCCTTTTCTTCCCTCCGCTTCCCTCCCTCCCTCCCTCCCT
CCCATCTGTTCTCCCTTCCCTTCCCTCCCTTCCCTTCCCTCCCTCCCTCCCTCCCTCCCTCCCTCCCTCC
TTTCTCTTCTTCC
TTCACATCATTTGTCCAAGACC TCCCTGGCCTGAGATAAACAT AAGTTGCAAAAGTGGCTTCC TGCAGC
CCATTTTCCAGGTTGGGAAACTGAGGCATGGGCCAAGGTCCACAGCCACACCCGAGGAAAGCAGCC
CCCAC TGAATGTCACCATGCACCAA AGTGCATGGTCTCGTGACACAAAGA GGGGAGATGACAGTGGC
TGGAGTTG TCAGAGCTGCTTTGA GGAAGCTCAGGCCTGATAGGCTTGACAGGGC CAAGGGGAAGCTAT
TGTGGAATGTCTTGGCCTTGAATGACAGG CTGCTGATTTTGGATCTGGA GAAAGCTCACACTGACTCTT
CCTGCTCCCC CAGTCT GTTTTCTCCTGCT ACTCCATCCAT GTATCCCTGAGTTTGGCCACAGTCCCT
CCACTGGTTTGCATGTCCACCTTCTTTGTTTGGCAAGCTCCTATTCATCCTTCAAAGCCCTAGCTTCA
ATACCTGCTACTTTCATGCAGCCATTGCTTATCCTTCAAGGAGAGCCTACTTCCCTCAAGGACCCCTGCTG
CTTC CAGTCTCACCTTCTGACTCACTGGG GATCCACTGAAGTGGAGGCTGTGTCTCCTCCCTCC AGCAA
GTCATCACTACCT TGGGGCCGAGGATACCCAGCTTGGAACTAGATACAGAAAT GCTGTTTTGAGAG
TGTACTG AATAAAAGATTACATGTTTGAACAA
    
```

**Fig. S4.** The TINCR transcript contains sense and antisense TINCR motif boxes. TINCR sequence with highlighted locations of antisense TINCR motif boxes (yellow), sense TINCR motif boxes (blue), TINCR probes used for RIA-Seq (red), and overlap of motif boxes and probes (green).

**a**

| GeneSymbol | RIA-Seq [Enrichment Score] | siTINCR [fold change] | siSTAU1 [fold change] |
|------------|----------------------------|-----------------------|-----------------------|
| DLX3       | 25.36909237                | 0.382624192           | 0.379454813           |
| ATP2C2     | 12.68454619                | 0.312299031           | 0.423079298           |
| PRSS27     | 11.37661928                | 0.40584479            | 0.381564802           |
| SLC31A1    | 9.659844732                | 0.475329551           | 0.460093825           |
| ALOXE3     | 9.037977717                | 0.485317235           | 0.263157789           |
| COTL1      | 9.037977717                | 2.33269874            | 2.111107435           |
| KRT80      | 7.39218058                 | 0.446582926           | 0.291587342           |
| ALOX12B    | 5.747760706                | 0.418993567           | 0.07124833            |
| CLDN7      | 5.422657307                | 2.848100391           | 2.124318373           |
| CST6       | 4.829922366                | 0.480630464           | 0.315344352           |
| CASP14     | 4.293041146                | 0.06978206            | 0.162329825           |
| KRT78      | 4.106758183                | 0.317537746           | 0.117684808           |
| PTPN21     | 3.622535932                | 0.212274062           | 0.338212058           |
| PCMTD2     | 3.622535932                | 0.475000191           | 0.446892581           |
| PGLYRP3    | 3.622535932                | 0.372677597           | 0.477641468           |
| KRT1       | 3.294364069                | 0.101884042           | 0.058760888           |
| EPHB6      | 3.018851937                | 0.372677597           | 0.227509706           |
| CPM        | 3.012580933                | 0.208049684           | 0.144686277           |
| LY6G6C     | 3.012580933                | 0.353308411           | 0.150621539           |
| IL22RA1    | 3.012580933                | 0.330334601           | 0.308854659           |
| SEMA4D     | 2.81864151                 | 0.305448275           | 0.333787076           |
| RORA       | 2.77983644                 | 0.40332088            | 0.132954084           |
| SPTLC3     | 2.617156143                | 0.473356816           | 0.322640623           |
| DGAT2      | 2.463996147                | 0.427797513           | 0.26999414            |
| PDZD2      | 2.414961183                | 0.473028823           | 0.475988954           |
| KCTD4      | 2.414961183                | 2.385017745           | 0.05509251            |
| SNX21      | 2.414961183                | 0.431370672           | 0.460412849           |
| SGPP2      | 2.259494429                | 0.412652704           | 0.48801588            |
| ANXA9      | 2.243886961                | 0.218241898           | 0.098005057           |
| NFE2L3     | 2.012515647                | 0.302498522           | 0.378929142           |
| NEAT1      | 1.811267966                | 0.367546834           | 0.361733721           |

**b**

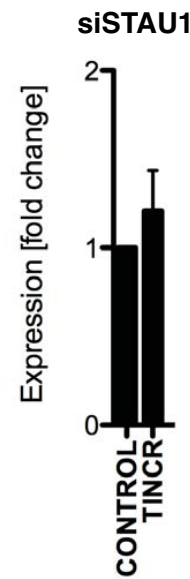

**c**

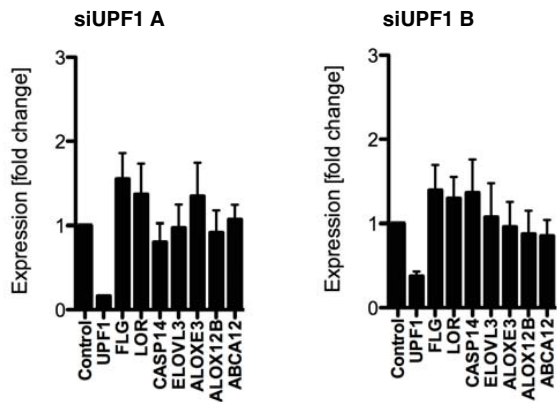

**d**

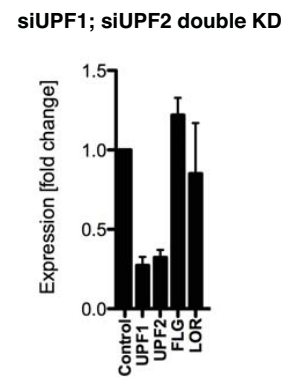

**e**

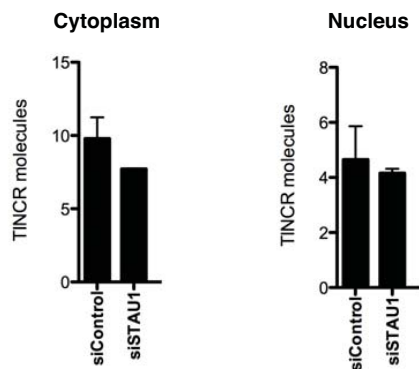

**Fig. S5.** TINCR controls differentiation gene expression independent of STAU1-mediated RNA decay. **(a)** List of transcripts showing significant enrichment to TINCR by RIA-Seq, as well as differential expression in TINCR- and STAU1- deficient epidermis.



**(b)** TINCR transcript expression is not altered in STAU1-depleted human epidermal tissue. Data are shown with s.d.m (n=4). **(c)** mRNA expression of genes important for lipid barrier synthesis and differentiation in UPF1-depleted tissue versus control. RNA expression data represent independent biologic replicates for duplicate independent UPF1 siRNAs (UPF1 A, UPF1 B). Data are shown with s.d.m (n=4). **(d)** mRNA expression of differentiation genes in UPF1; UPF2 double-deficient tissue. Data are shown with s.d.m (n=3). **(e)** Single molecule RNA fluorescence in situ hybridization (FISH) analysis showing TINCR abundance in nuclei and cytoplasm of differentiated (day 3) keratinocytes.

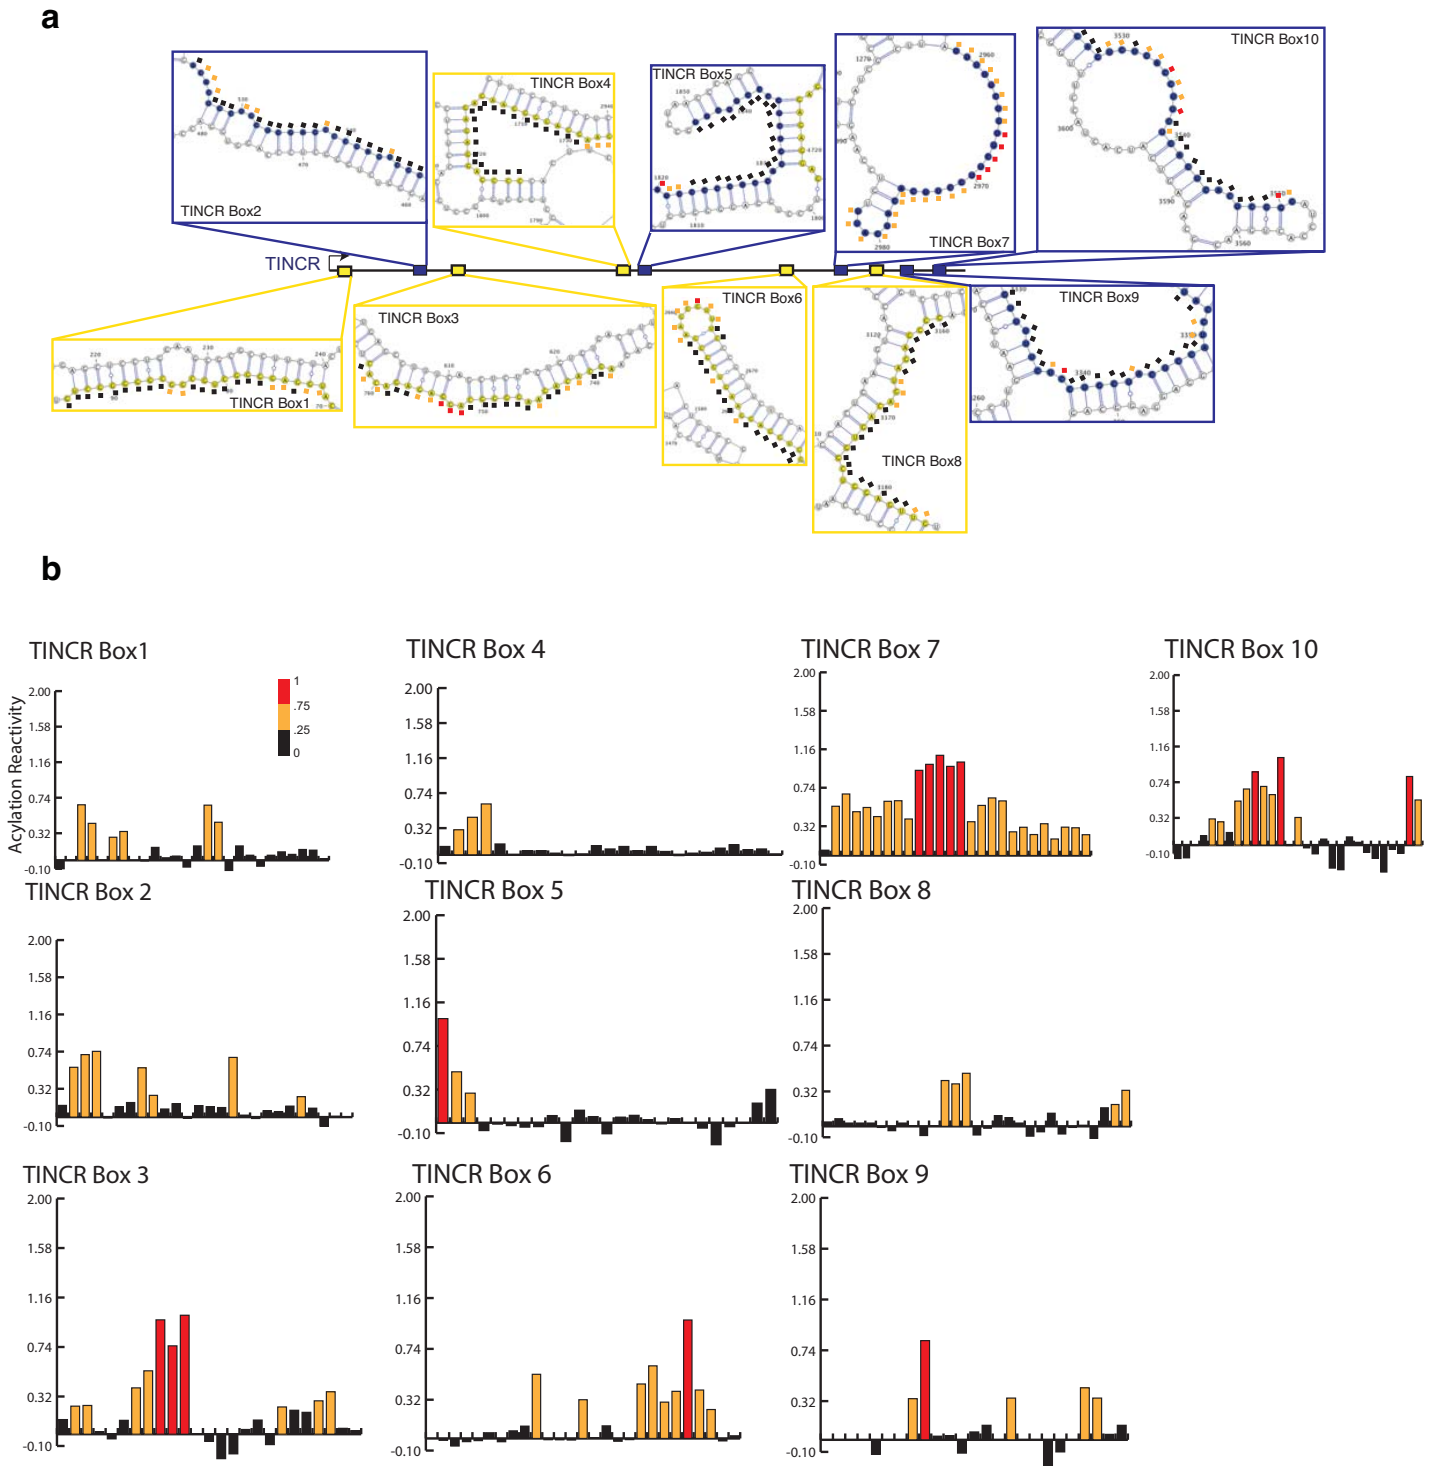

**Fig. S6.** Structure of TINCR and Acylation Reactivity. **(a)** Primary and Secondary structure representation for TINCR. TINCR boxes are highlighted on the primary sequence as yellow and blue boxes. mFOLD predicted secondary structures for the TINCR boxes are shown within colored insets. **(b)** Normalized acylation reactivities for all 10 TINCR boxes. Acylation reactivity is shown on the Y-axis.

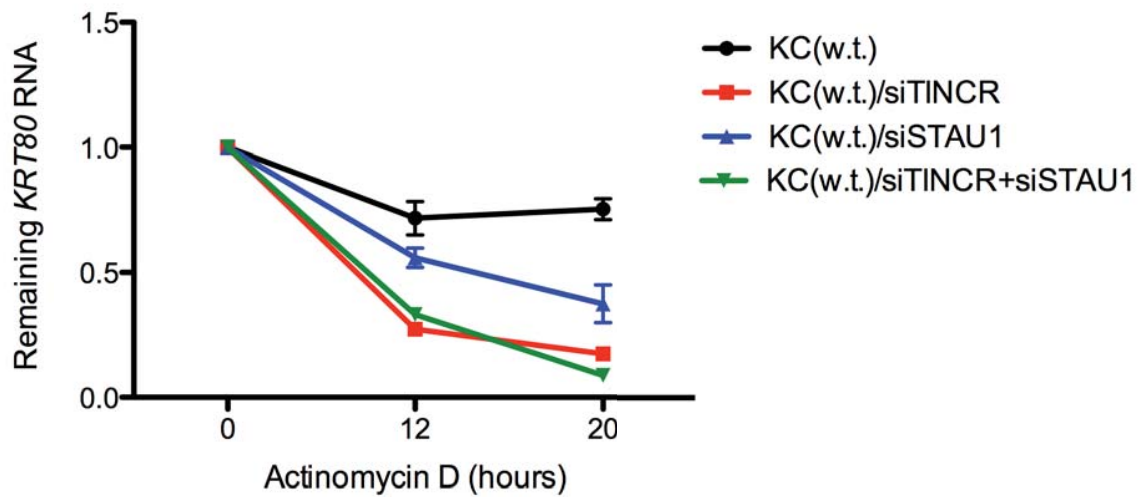

**Fig. S7.** TINCR and STAU1 control the stability of KRT80 mRNA. (a) RNA stability assays were performed in differentiated keratinocytes using ActinomycinD to disrupt RNA synthesis degradation rates of the differentiation gene mRNA KRT80 over 20h.

**Table S1**

| <b>Gene</b> | <b>fpkm day 0</b> | <b>fpkm day 3</b> | <b>fpkm day 6</b> |
|-------------|-------------------|-------------------|-------------------|
| NR_027082   | 44.5161           | 2.21932           | 3.49087           |
| NR_033972   | 1.18455           | 1.15544           | 8.75993           |
| NR_033799   | 29.5149           | 56.508            | 61.9139           |
| NR_024437   | 1                 | 1.47822           | 7.01719           |
| NR_003138   | 5.84854           | 1.48588           | 2.29609           |
| NR_024357   | 1                 | 1                 | 8.61481           |
| NR_002987   | 89.9158           | 1                 | 1                 |
| NR_036515   | 50.3384           | 14.6635           | 67.7472           |
| NR_002826   | 37.0041           | 23.4201           | 14.6984           |
| NR_024282   | 1                 | 5.78784           | 4.39737           |
| NR_003558   | 5.90711           | 6.14086           | 13.0361           |
| NR_002473   | 10.8281           | 9.4216            | 27.0754           |
| NR_015368   | 10.1348           | 15.3937           | 20.3459           |
| NR_001434   | 41.0621           | 51.7826           | 100.108           |
| NR_027693   | 2.61375           | 21.8804           | 7.09624           |
| NR_003582   | 3.91643           | 2.57484           | 16.8848           |
| NR_037605   | 1                 | 5.58292           | 1                 |
| NR_027451   | 174.803           | 440.887           | 348.923           |
| NR_023938   | 2.0121            | 7.13371           | 6.88084           |
| NR_034178   | 43.8935           | 77.7932           | 104.183           |
| NR_033339   | 13.6523           | 10.5079           | 5.62764           |
| NR_026597   | 1                 | 1                 | 6.9752            |
| NR_002144   | 66.2732           | 107.545           | 141.904           |
| NR_002822   | 101.285           | 66.8805           | 34.9024           |
| NR_033891   | 1                 | 1                 | 5.21653           |
| NR_003697   | 91.4925           | 28.183            | 46.7231           |
| NR_027775   | 5.296             | 1.54365           | 1.81386           |
| NR_027337   | 3.49474           | 1                 | 5.38601           |
| NR_028502   | 33.1788           | 11.1404           | 28.403            |
| NR_024253   | 5.88271           | 3.05228           | 1                 |
| NR_033399   | 19.3039           | 2.5037            | 1.06737           |
| NR_015378   | 4.37973           | 2.15748           | 5.68639           |
| NR_003595   | 3.39158           | 4.73683           | 9.02335           |
| NR_033415   | 2.51258           | 10.7582           | 12.5861           |
| NR_024204   | 4.80195           | 1                 | 26.9356           |
| NR_015424   | 1                 | 5.13929           | 3.04166           |
| NR_033885   | 23.0194           | 9.66736           | 18.0725           |
| NR_028301   | 15.5339           | 7.96521           | 2.45991           |
| NR_027781   | 22.8528           | 1                 | 6.82439           |
| NR_026950   | 6.58237           | 3.78068           | 3.29003           |

|           |         |         |         |
|-----------|---------|---------|---------|
| NR_024386 | 10.8825 | 15.1209 | 52.6306 |
| NR_003367 | 13.1109 | 8.37035 | 38.4435 |
| NR_034105 | 20.4937 | 43.0706 | 24.0363 |
| NR_026844 | 7.7844  | 27.6071 | 17.6891 |
| NR_026761 | 27.9523 | 25.1442 | 11.8204 |
| NR_003370 | 6.60361 | 2.37245 | 2.73303 |
| NR_034120 | 6.97097 | 1       | 47.5258 |
| NR_004844 | 2.06714 | 5.07384 | 6.64914 |
| NR_033961 | 31.2597 | 56.5659 | 141.645 |
| NR_015379 | 1.90236 | 2.28735 | 415.199 |
| NR_036659 | 42.0262 | 252.207 | 377.761 |
| NR_023917 | 14.4255 | 40.7983 | 45.7277 |
| NR_024374 | 18.2201 | 2.91684 | 1       |
| NR_024271 | 8.40994 | 2.47074 | 4.93525 |
| NR_037596 | 6.15168 | 3.65141 | 2.63748 |
| NR_026854 | 9.8797  | 7.9634  | 3.31347 |
| NR_002775 | 2.99974 | 5.92959 | 8.2819  |
| NR_003563 | 18.673  | 6.90342 | 11.3005 |
| NR_028408 | 9.11858 | 13.2854 | 27.8595 |
| NR_002453 | 4.75648 | 4.07579 | 20.4619 |
| NR_015395 | 28.6212 | 12.7348 | 37.2568 |
| NR_024031 | 277.094 | 133.367 | 250.059 |
| NR_036750 | 40.227  | 49.7601 | 200.386 |
| NR_036461 | 5.71849 | 3.77438 | 11.459  |
| NR_024057 | 1.25407 | 1.95299 | 10.7428 |
| NR_030737 | 15.8315 | 40.3702 | 17.9313 |
| NR_029393 | 29.2446 | 859.928 | 484.041 |
| NR_027033 | 4.08633 | 1.65224 | 6.49594 |
| NR_027003 | 1       | 1.75497 | 11.0367 |
| NR_024344 | 1       | 7.01474 | 3.3599  |
| NR_036521 | 7.74338 | 5.34498 | 19.5926 |
| NR_024063 | 6.66414 | 1.61137 | 43.0339 |
| NR_027064 | 2.42232 | 107.693 | 241.056 |
| NR_001591 | 33.2051 | 71.4044 | 71.524  |
| NR_024151 | 1       | 1       | 5.89128 |
| NR_026999 | 7.62301 | 3.29317 | 4.14155 |
| NR_027028 | 4.873   | 1.42925 | 5.38582 |
| NR_027788 | 5.14857 | 2.34809 | 4.27692 |
| NR_027301 | 11.6744 | 10.9589 | 5.35501 |
| NR_033896 | 10.711  | 11.1066 | 21.5553 |
| NR_024111 | 56.3771 | 11.1681 | 50.7176 |
| NR_003098 | 428.3   | 80.7259 | 192.803 |
| NR_036685 | 1.28467 | 5.4718  | 3.39581 |

|           |         |         |         |
|-----------|---------|---------|---------|
| NR_030732 | 1       | 53.1117 | 586.296 |
| NR_036581 | 1       | 1       | 166.668 |
| NR_024089 | 1       | 6.3017  | 1       |
| NR_002821 | 5.31278 | 8.33036 | 20.8535 |
| NR_024451 | 2.42774 | 8.5884  | 22.1274 |
| NR_015441 | 6.19526 | 5.1294  | 24.7861 |
| NR_003615 | 197.273 | 206.599 | 83.738  |
| NR_033360 | 5.29745 | 1       | 1.05669 |
| NR_028503 | 2.21718 | 8.91783 | 77.7609 |
| NR_026966 | 1.44482 | 5.66863 | 1       |
| NR_027392 | 9.45035 | 4.33655 | 4.86147 |
| NR_027358 | 1       | 1       | 40.3152 |
| NR_024480 | 1       | 4.83472 | 5.78638 |
| NR_026752 | 16.3379 | 9.88641 | 5.82389 |
| NR_003505 | 6.72962 | 3.10399 | 4.72359 |
| NR_023383 | 8.47257 | 3.76082 | 10.5428 |
| NR_004845 | 2.67742 | 4.24044 | 5.82364 |
| NR_002809 | 8.42313 | 4.21771 | 2.19891 |
| NR_003500 | 14.3583 | 16.5511 | 33.6948 |
| NR_027155 | 2.80227 | 2.68885 | 15.1484 |
| NR_028059 | 6.75113 | 5.58864 | 3.25318 |
| NR_027363 | 86.3246 | 59.1684 | 30.3347 |
| NR_027263 | 8.91059 | 10.5551 | 142.809 |
| NR_002814 | 6.4533  | 4.10936 | 1.06969 |
| NR_029392 | 27.9487 | 326.129 | 199.428 |
| NR_024553 | 3.1509  | 8.68018 | 5.07565 |
| NR_002168 | 28.131  | 32.8171 | 63.567  |
| NR_003264 | 29.3146 | 10.6665 | 12.4916 |
| NR_026592 | 7.00501 | 1.82337 | 1.27805 |
| NR_024387 | 5.09144 | 12.3948 | 15.2583 |
| NR_034107 | 11.035  | 4.42482 | 1.47051 |
| NR_034106 | 12.4612 | 3.07105 | 3.78142 |
| NR_026846 | 12.7088 | 19.1985 | 39.8588 |
| NR_026757 | 49.6545 | 102.134 | 87.0966 |
| NR_037178 | 5.02023 | 1       | 1.38812 |
| NR_024333 | 21.3949 | 10.9461 | 10.196  |
| NR_003023 | 10.7424 | 1       | 8.33466 |
| NR_034011 | 24.756  | 79.9354 | 20.2895 |
| NR_003062 | 1       | 103.672 | 1391.34 |
| NR_026829 | 5.11737 | 1.94144 | 1       |
| NR_024056 | 13.3952 | 7.55724 | 1       |
| NR_036503 | 5.62618 | 2.56043 | 2.28913 |
| NR_027460 | 1.46437 | 3.62209 | 5.04642 |

|           |         |         |         |
|-----------|---------|---------|---------|
| NR_026906 | 1.02395 | 9.01145 | 11.2284 |
| NR_026551 | 24.7592 | 24.5858 | 56.605  |
| NR_033248 | 5.23666 | 15.6114 | 9.88544 |
| NR_003254 | 3.82217 | 4.12541 | 16.5784 |
| NR_024110 | 1.27007 | 32.8808 | 68.915  |
| NR_033250 | 5.88538 | 9.05812 | 12.301  |
| NR_024607 | 68.8715 | 7.74971 | 5.34836 |
| NR_024618 | 4.46851 | 16.9349 | 12.6094 |
| NR_003531 | 5.56697 | 1       | 1       |
| NR_027512 | 2.10533 | 3.296   | 6.42945 |
| NR_002941 | 31.4905 | 22.1468 | 9.14303 |
| NR_026578 | 1       | 4.46561 | 62.9054 |
| NR_027345 | 5.15617 | 1       | 1       |
| NR_036677 | 8.2912  | 4.44424 | 1       |
| NR_001544 | 1       | 5.00635 | 4.82236 |
| NR_037599 | 1.61582 | 5.54682 | 10.8503 |
| NR_036513 | 1       | 7.18701 | 29.6069 |
| NR_034171 | 1.66439 | 3.52608 | 7.50114 |
| NR_028272 | 275.68  | 112.636 | 773.34  |
| NR_023311 | 2.41389 | 1       | 5.10567 |
| NR_027442 | 10.6538 | 7.85868 | 4.15684 |
| NR_026881 | 1       | 5.48687 | 1       |
| NR_024373 | 212.121 | 201.849 | 1411.16 |
| NR_027789 | 5.07449 | 1       | 3.69846 |
| NR_024187 | 3.05261 | 1       | 5.03183 |
| NR_027350 | 5.11818 | 1       | 1.12466 |
| NR_015370 | 44.8828 | 57.5283 | 138.283 |
| NR_002824 | 17.523  | 2.79758 | 1.52379 |
| NR_024249 | 8.91684 | 14.0803 | 3.77516 |
| NR_002935 | 1       | 5.90452 | 1       |
| NR_027063 | 97.0256 | 51.9219 | 42.3062 |
| NR_003142 | 16.3074 | 12.75   | 152.288 |
| NR_028090 | 7.64527 | 15.9639 | 13.2105 |
| NR_024475 | 26.4159 | 3.49506 | 10.0992 |
| NR_029423 | 4.22589 | 7.7701  | 12.4786 |
| NR_015431 | 1       | 1       | 19.5573 |
| NR_002786 | 10.3068 | 10.0023 | 32.2955 |
| NR_024322 | 32.356  | 20.5761 | 10.3544 |
| NR_024492 | 1.76607 | 1.61499 | 6.82844 |
| NR_024349 | 3.17956 | 23.0536 | 169.517 |
| NR_026905 | 2.81589 | 5.28797 | 13.0832 |
| NR_003284 | 349.389 | 229.303 | 139.905 |
| NR_001446 | 11.2557 | 30.1451 | 31.2935 |

|           |         |         |         |
|-----------|---------|---------|---------|
| NR_003281 | 3.74384 | 7.63622 | 4.46152 |
| NR_036650 | 6.64622 | 2.0704  | 2.62256 |
| NR_036496 | 28.0478 | 16.6463 | 5.41699 |
| NR_002196 | 105.074 | 5810.32 | 999.936 |
| NR_034010 | 72.293  | 135.649 | 1       |
| NR_027154 | 19.3848 | 19.6647 | 50.3128 |
| NR_036555 | 1       | 1       | 15.3037 |
| NR_033742 | 6.75482 | 25.5844 | 16.3316 |
| NR_037167 | 14.9467 | 11.22   | 5.20612 |
| NR_036502 | 9.97188 | 3.23608 | 1       |
| NR_002323 | 82.1778 | 87.0545 | 379.531 |
| NR_003579 | 25.3898 | 50.9844 | 33.5993 |
| NR_036455 | 9.50528 | 1       | 1       |
| NR_023915 | 13.0469 | 4.53832 | 2.02103 |
| NR_037177 | 13.2115 | 13.7519 | 4.64769 |
| NR_028597 | 1.94966 | 9.77658 | 1.94164 |
| NR_001545 | 23.4507 | 10.484  | 8.39253 |
| NR_033266 | 8.01697 | 1.71304 | 3.23789 |
| NR_015451 | 21.6748 | 45.0426 | 38.7513 |
| NR_003716 | 7.67991 | 3.25423 | 1.54012 |
| NR_033752 | 1.56858 | 1.62437 | 5.23429 |
| NR_023919 | 27.999  | 16.7844 | 8.3275  |
| NR_023384 | 7.00356 | 1.93261 | 3.2902  |
| NR_024368 | 17.939  | 8.42572 | 14.1154 |
| NR_002308 | 30.644  | 68.3444 | 53.3866 |
| NR_036678 | 1.02134 | 1       | 7.31406 |
| NR_026887 | 1.25341 | 5.32528 | 1.54753 |
| NR_033734 | 20.9446 | 6.05365 | 6.51076 |
| NR_027793 | 1       | 2.50605 | 7.57449 |
| NR_028350 | 6.38314 | 6.52372 | 2.85353 |
| NR_033416 | 4.66195 | 3.37521 | 11.2849 |
| NR_029620 | 1       | 1       | 198.658 |
| NR_026777 | 6.51446 | 3.17088 | 1.62907 |
| NR_003130 | 116.718 | 39.1201 | 62.1734 |
| NR_033849 | 13.3505 | 49.3474 | 16.357  |
| NR_002605 | 53.4695 | 39.6043 | 8.68107 |
| NR_027244 | 14.367  | 8.67544 | 5.20329 |
| NR_033297 | 8.13175 | 1.59738 | 1.09736 |
| NR_024241 | 11.6077 | 9.18077 | 2.2189  |
| NR_026913 | 6.38211 | 1.89548 | 1.96705 |
| NR_015430 | 4.33309 | 17.1655 | 12.6367 |
| NR_027322 | 1       | 6.52168 | 4.86052 |
| NR_015421 | 1       | 9.37152 | 1.26754 |



|           |         |         |         |
|-----------|---------|---------|---------|
| NR_037665 | 46.4144 | 73.1827 | 120.241 |
| NR_033928 | 8.74906 | 5.40636 | 1.86819 |
| NR_003110 | 8.7415  | 4.18518 | 7.63575 |
| NR_036512 | 1.1834  | 1       | 8.83537 |
| NR_026967 | 1.47858 | 5.73825 | 1.07094 |
| NR_033374 | 7.8506  | 1       | 1.2811  |
| NR_037629 | 5.86159 | 6.49228 | 1       |
| NR_027156 | 6.71687 | 4.02203 | 1.60393 |
| NR_026792 | 6.12733 | 7.41648 | 12.3718 |
| NR_001459 | 9.20567 | 1       | 1       |
| NR_036447 | 17.2552 | 8.32968 | 12.3185 |
| NR_024586 | 1.50943 | 1.42157 | 27.4768 |
| NR_024034 | 6.54794 | 1.73843 | 2.6459  |
| NR_026984 | 25.9175 | 33.2499 | 7.61001 |
| NR_002305 | 814.463 | 917.623 | 395.514 |
| NR_027712 | 1.92    | 2.61776 | 7.03741 |
| NR_037601 | 8.4718  | 6.39564 | 44.6109 |
| NR_015366 | 128.274 | 69.7484 | 57.5992 |
| NR_001447 | 34.3719 | 21.5066 | 8.48985 |
| NR_002454 | 8.74735 | 4.17826 | 10.4003 |
| NR_003038 | 2115.5  | 1624.48 | 601.524 |
| NR_015389 | 32.0188 | 24.5105 | 12.9614 |
| NR_001588 | 19.8089 | 1       | 1       |
| NR_002924 | 2.08448 | 4.02206 | 9.43404 |
| NR_024116 | 1       | 2.83502 | 8.05082 |
| NR_027238 | 83.4389 | 83.0439 | 207.475 |
| NR_037631 | 9.5341  | 21.8449 | 20.8578 |
| NR_015359 | 3.12449 | 5.20747 | 1       |
| NR_036692 | 28.1676 | 9.58713 | 28.4093 |
| NR_002920 | 1       | 52.8337 | 1       |
| NR_033410 | 10.4803 | 16.791  | 30.6274 |
| NR_034147 | 1       | 1.86719 | 7.32442 |
| NR_033381 | 32.709  | 46.9642 | 87.7486 |
| NR_024206 | 159.168 | 80.191  | 1135.96 |
| NR_003610 | 13.0022 | 3.19314 | 8.28994 |
| NR_028327 | 7.21729 | 1.7727  | 1.56203 |
| NR_003578 | 7.63905 | 2.60562 | 13.7059 |
| NR_003672 | 10.6282 | 2.90321 | 1.39142 |
| NR_026762 | 13.1481 | 15.5962 | 51.9621 |
| NR_002816 | 6.00819 | 1.50897 | 1.61616 |
| NR_028303 | 6.28008 | 1       | 4.20227 |
| NR_036504 | 2.5373  | 5.42717 | 1.98163 |
| NR_024021 | 1       | 1       | 59.1548 |

|           |         |         |         |
|-----------|---------|---------|---------|
| NR_024391 | 8.48919 | 3.37027 | 2.92904 |
| NR_026797 | 1       | 6.34666 | 327.055 |
| NR_028504 | 9.47077 | 13.9216 | 124.936 |

**Table S1.** Differentially expressed annotated lncRNAs during keratinocyte differentiation. Table of 258 annotated lncRNAs altered during epidermal keratinocyte differentiation in vitro. Annotated non-coding RNAs with a FDR adjusted p-value < 0.05, FPKM > 5 and at least 2-fold change during calcium-induced differentiation in at least 1 out of 3 time points are included. RefSeq IDs as well as FPKM values in undifferentiated (day 0) and differentiated keratinocytes (days 3 and 6) are shown.

Table S2

| GeneID   | AffyID       | Log2_Fold.Change |
|----------|--------------|------------------|
| EPCAM    | 201839_s_at  | 1.948131026      |
| CTH      | 217127_at    | 1.80717268       |
| FAM195A  | 1553715_s_at | 1.400186103      |
| FAM195A  | 225861_at    | 1.323767554      |
| C12orf24 | 204521_at    | 1.258590846      |
| ADORA2B  | 205891_at    | 1.19579889       |
| FAM169A  | 213954_at    | 1.121262727      |
| PITX1    | 208502_s_at  | 1.270379171      |
| KLHL23   | 213610_s_at  | 1.042063997      |
| GPX2     | 202831_at    | 1.525344447      |
| KRT19    | 201650_at    | 2.550902025      |
| COTL1    | 224583_at    | 1.222331548      |
| TM7SF3   | 226478_at    | 1.067591832      |
| CELF2    | 202157_s_at  | 1.052016378      |
| DEPDC7   | 228293_at    | 1.200105877      |
| MME      | 203434_s_at  | 1.020174534      |
| ASNS     | 205047_s_at  | 1.471065462      |
| AGPAT9   | 224480_s_at  | 1.820873478      |
| ERAP2    | 227462_at    | 1.155219393      |
| PITX1    | 209587_at    | 1.094600355      |
| SAMD5    | 228653_at    | 1.085205814      |
| PHACTR3  | 227949_at    | 1.207683363      |
| FST      | 226847_at    | 1.293148862      |
| PM20D2   | 225421_at    | 1.035765518      |
| GOLSYN   | 218692_at    | 1.107644997      |
| NA       | 221059_s_at  | 1.172778426      |
| KITLG    | 226534_at    | 1.187211259      |
| CBS      | 212816_s_at  | 1.525103945      |
| ENTPD3   | 206191_at    | 1.010083151      |
| HS6ST2   | 230030_at    | 1.278597366      |
| HS6ST2   | 1552767_a_at | 1.126487602      |
| ADAMTS1  | 222162_s_at  | 1.345845424      |
| DNAJB4   | 203810_at    | 1.185472518      |
| FST      | 207345_at    | 1.471866692      |
| IKBIP    | 236249_at    | 1.150515066      |
| VGLL3    | 227399_at    | 1.10648231       |
| FST      | 204948_s_at  | 1.192328877      |
| TAF1A    | 206613_s_at  | 1.037007446      |
| CBS      | 1553972_a_at | 1.387367118      |
| PSAT1    | 223062_s_at  | 1.176789222      |
| GCHFR    | 204867_at    | 1.400110762      |
| NOS1     | 239132_at    | 1.283536784      |
| C4orf19  | 219450_at    | 1.159157357      |

|           |              |             |
|-----------|--------------|-------------|
| LOC148189 | 235191_at    | 1.043897988 |
| ASS1      | 207076_s_at  | 1.360629825 |
| NA        | 235921_at    | 1.169226877 |
| SLC16A9   | 227506_at    | 1.10592285  |
| FBXL14    | 213145_at    | 1.038101001 |
| NA        | 236075_s_at  | 1.134866842 |
| ZNF575    | 1557119_a_at | 1.132162869 |
| NA        | 1558871_at   | 1.234450605 |
| NRG1      | 206343_s_at  | 1.311250955 |
| UCHL1     | 201387_s_at  | 1.006631978 |
| NA        | 1557051_s_at | 1.374715441 |
| AGPS      | 225114_at    | 1.317952364 |
| KCTD12    | 212188_at    | 1.002823778 |
| CHAC1     | 219270_at    | 1.146826483 |
| GPR110    | 238689_at    | 1.448289471 |
| CEACAM1   | 209498_at    | 1.302797305 |
| FAM73A    | 235125_x_at  | 1.090676383 |
| KCTD12    | 212192_at    | 1.227847379 |
| TMEM64    | 225974_at    | 1.003081887 |
| CBX6      | 202047_s_at  | 1.151320308 |
| S100P     | 204351_at    | 1.108043208 |
| DNAH14    | 242283_at    | 1.066974913 |
| FAM84B    | 225864_at    | 1.062591344 |
| NA        | 239346_at    | 1.228126019 |
| ANXA1     | 233011_at    | 1.313686882 |
| FBXL16    | 227641_at    | 1.483070471 |
| ANKRD6    | 204671_s_at  | 1.008061142 |
| CLMN      | 221042_s_at  | 1.72985803  |
| GCLC      | 202922_at    | 1.028581431 |
| C14orf34  | 1555786_s_at | 1.082177173 |
| RAB7L1    | 218700_s_at  | 1.026065865 |
| NA        | 228642_at    | 1.036576006 |
| PSPH      | 205194_at    | 1.188243101 |
| EDN1      | 218995_s_at  | 1.072571301 |
| PLAT      | 201860_s_at  | 1.034571073 |
| DHRS9     | 224009_x_at  | 1.058728436 |
| VGLL1     | 215729_s_at  | 1.029710718 |
| UPP1      | 203234_at    | 1.086980654 |
| KCTD4     | 240512_x_at  | 1.254190266 |
| CLDN7     | 202790_at    | 1.509700047 |
| CYP2E1    | 209975_at    | 1.023858177 |
| NA        | 222376_at    | 1.080142486 |
| CELF2     | 202158_s_at  | 1.16346847  |
| SLC39A8   | 209267_s_at  | 1.14305215  |
| GLUL      | 217202_s_at  | 1.003993119 |
| TRNP1     | 227862_at    | 1.135904609 |

|          |              |              |
|----------|--------------|--------------|
| DHRS9    | 219799_s_at  | 1.09094102   |
| EMP1     | 201324_at    | 1.054482704  |
| SEC24D   | 202375_at    | 1.008125673  |
| MAL      | 204777_s_at  | 2.080315465  |
| UPK1B    | 210064_s_at  | 1.171538093  |
| EMP1     | 201325_s_at  | 1.114464521  |
| GLUL     | 200648_s_at  | 1.062461867  |
| CRTAM    | 206914_at    | 1.827606859  |
| EDN1     | 1564630_at   | 1.340584513  |
| KCNQ5    | 244623_at    | 1.017354977  |
| C9orf64  | 235940_at    | 1.050597463  |
| MUC1     | 213693_s_at  | 1.310529461  |
| TSPAN1   | 209114_at    | 1.143910246  |
| SLC7A11  | 217678_at    | 1.076354958  |
| POPDC3   | 219926_at    | 1.069865101  |
| GUCY1B3  | 203817_at    | 1.244392206  |
| IGFBP7   | 201163_s_at  | 1.074713736  |
| NTM      | 227566_at    | 1.395810194  |
| C9orf150 | 227443_at    | 1.071393127  |
| CRIP1    | 205081_at    | 1.087136027  |
| TGFBI    | 201506_at    | -2.264710402 |
| RPTN     | 1553454_at   | -4.627088202 |
| LYNX1    | 1554179_s_at | -2.076145207 |
| KRT1     | 205900_at    | -3.295155982 |
| NA       | 243780_at    | -1.947157951 |
| KRT10    | 213287_s_at  | -1.818008338 |
| DSC1     | 207324_s_at  | -1.324979849 |
| CEACAM5  | 201884_at    | -1.283302296 |
| KRT10    | 210633_x_at  | -1.773615324 |
| CD36     | 209555_s_at  | -5.110978369 |
| KRT10    | 207023_x_at  | -1.908409011 |
| FGD2     | 1553906_s_at | -1.039017257 |
| KRT4     | 213240_s_at  | -1.705170695 |
| DIO2     | 231240_at    | -3.753031404 |
| DIO2     | 203700_s_at  | -3.571556272 |
| RHBG     | 220510_at    | -1.961574233 |
| LMTK3    | 1557103_a_at | -1.152011905 |
| RFTN1    | 1569787_at   | -3.950212365 |
| PLBD1    | 218454_at    | -1.250103118 |
| KRT77    | 237120_at    | -1.662430236 |
| MAF      | 229327_s_at  | -2.003547184 |
| MYH14    | 226988_s_at  | -1.435239575 |
| KRT9     | 208188_at    | -3.087387122 |
| CD36     | 228766_at    | -4.703289969 |
| AMDHD1   | 229596_at    | -2.05357371  |
| ELF5     | 220625_s_at  | -3.497039292 |

|              |              |              |
|--------------|--------------|--------------|
| CPM          | 243403_x_at  | -2.006027826 |
| ZNF107       | 243312_at    | -2.026636558 |
| UPK1A        | 214624_at    | -2.532786996 |
| FRY          | 204072_s_at  | -2.039245538 |
| FNIP2        | 226460_at    | -1.201925351 |
| NA           | 244417_at    | -1.320944269 |
| CD36         | 206488_s_at  | -4.623992994 |
| NFATC2       | 226991_at    | -1.384068537 |
| MAF          | 206363_at    | -2.048728842 |
| CRNN         | 220090_at    | -2.697467604 |
| LOC645638    | 229566_at    | -1.564742212 |
| KRT2         | 207908_at    | -5.4446826   |
| NA           | 226382_at    | -2.237731704 |
| SORT1        | 224818_at    | -1.26569171  |
| SLC30A2      | 230084_at    | -1.505586288 |
| DLX3         | 231778_at    | -1.385847696 |
| PGLYRP4      | 220944_at    | -1.054296364 |
| PTPN21       | 40524_at     | -2.724036112 |
| PADI1        | 223739_at    | -2.494343759 |
| NA           | 243176_at    | -2.236607998 |
| IL1F10       | 224262_at    | -1.414131402 |
| PCSK6        | 207414_s_at  | -1.784641077 |
| PTPN21       | 205438_at    | -2.624899895 |
| SIGLEC15     | 215856_at    | -1.261088165 |
| NA           | 226959_at    | -1.916490981 |
| NA           | 238431_at    | -1.64739826  |
| CPM          | 235706_at    | -2.389512559 |
| PLAC2        | 229385_s_at  | -1.55526871  |
| METTL7A      | 207761_s_at  | -3.059156688 |
| KRT79        | 1569909_at   | -2.793217902 |
| LOC100129122 | 231062_at    | -1.817606555 |
| ZBTB7C       | 227782_at    | -2.935838409 |
| CTSD         | 227863_at    | -2.145947031 |
| SLC46A2      | 223816_at    | -3.799699973 |
| HIST1H4H     | 232035_at    | -1.36571572  |
| GPRIN2       | 1554541_a_at | -1.260578343 |
| TGM5         | 207911_s_at  | -2.384157991 |
| AADACL2      | 240420_at    | -3.200436335 |
| SLC19A3      | 239345_at    | -3.710632624 |
| NA           | 206655_s_at  | -1.6146201   |
| GPR68        | 229055_at    | -1.000800531 |
| TP53INP2     | 224836_at    | -1.775270369 |
| POSTN        | 210809_s_at  | -3.027151438 |
| FLJ22536     | 229280_s_at  | -1.5400898   |
| CPM          | 235019_at    | -2.399452847 |
| GADD45G      | 204121_at    | -1.040609237 |

|              |              |              |
|--------------|--------------|--------------|
| FNIP2        | 225924_at    | -1.198535842 |
| MXI1         | 202364_at    | -1.410272054 |
| ITGAM        | 205786_s_at  | -4.230373972 |
| GSTT2        | 205439_at    | -2.833838705 |
| KCNE1        | 236407_at    | -1.478918684 |
| SNTB1        | 226438_at    | -1.956400782 |
| PTGER3       | 213933_at    | -3.045377975 |
| DSG1         | 206642_at    | -1.136799459 |
| NA           | 236423_at    | -1.715816406 |
| ZNF662       | 228538_at    | -1.548949878 |
| OASL         | 205660_at    | -1.810529456 |
| PLXDC2       | 227276_at    | -1.611208931 |
| C12orf28     | 1556267_at   | -1.266483847 |
| NA           | 228442_at    | -1.328337553 |
| FA2H         | 219429_at    | -1.176846381 |
| LOC643008    | 229740_at    | -1.08290564  |
| ALOX12B      | 207381_at    | -1.254557563 |
| CREB3L2      | 228759_at    | -1.021041079 |
| ACER1        | 1553929_at   | -2.058408107 |
| IL22RA1      | 220056_at    | -1.597646485 |
| SLC39A2      | 220413_at    | -1.615910066 |
| PDZK1IP1     | 1553589_a_at | -2.313950164 |
| PCOTH        | 222277_at    | -1.447622194 |
| ACSBG1       | 206465_at    | -4.152206128 |
| RASAL1       | 219752_at    | -1.720586925 |
| ATP2C2       | 214798_at    | -1.341072885 |
| SEMA4D       | 203528_at    | -1.711380998 |
| CPM          | 206100_at    | -2.24754171  |
| CRYAB        | 209283_at    | -1.399656944 |
| LOC100049716 | 228647_at    | -3.200080991 |
| TNFSF10      | 202687_s_at  | -1.250531859 |
| GNG4         | 205184_at    | -2.160183158 |
| SORT1        | 212807_s_at  | -1.145008796 |
| PDZK1IP1     | 219630_at    | -2.342684591 |
| RDH12        | 242998_at    | -1.448808885 |
| NA           | 226865_at    | -1.839369247 |
| GPR1         | 214605_x_at  | -1.389426322 |
| MX2          | 204994_at    | -1.464517851 |
| CD55         | 1555950_a_at | -1.047324059 |
| RORA         | 226682_at    | -1.348683107 |
| HYAL4        | 220249_at    | -2.565101737 |
| LYNX1        | 226305_at    | -1.235201759 |
| KIAA1199     | 212942_s_at  | -1.25399683  |
| OVOL1        | 206604_at    | -1.237636959 |
| NA           | 230710_at    | -1.571636767 |
| KRT80        | 231849_at    | -1.163265377 |

|          |              |              |
|----------|--------------|--------------|
| ITPKB    | 203723_at    | -1.271378016 |
| GAS7     | 210872_x_at  | -1.588569036 |
| FAM3D    | 227676_at    | -2.229677229 |
| CALML3   | 210020_x_at  | -2.656532817 |
| EEF1A2   | 204540_at    | -1.075414286 |
| C5orf46  | 1554195_a_at | -2.725125189 |
| BEX2     | 224367_at    | -1.453551814 |
| SNX21    | 1553961_s_at | -1.311410066 |
| SERPINB4 | 211906_s_at  | -2.065593148 |
| ASAP3    | 222236_s_at  | -1.250128129 |
| CASP14   | 231722_at    | -3.840997158 |
| MYH14    | 232977_x_at  | -1.167668705 |
| FHDC1    | 226599_at    | -1.125178709 |
| GPR137B  | 204137_at    | -1.234733174 |
| CAMK1D   | 235626_at    | -1.381352798 |
| NA       | 239885_at    | -1.514673723 |
| NDUFA4L2 | 218484_at    | -1.676112713 |
| NA       | 214399_s_at  | -1.008539173 |
| CSF2RB   | 205159_at    | -1.632336269 |
| NA       | 243383_at    | -1.2463779   |
| MYH14    | 234290_x_at  | -1.223288279 |
| C5orf4   | 48031_r_at   | -1.718179987 |
| CALML5   | 220414_at    | -1.306027929 |
| ETV7     | 224225_s_at  | -2.49894097  |
| CYP4F22  | 244692_at    | -1.287446618 |
| C10orf99 | 227736_at    | -1.88804212  |
| GCNT3    | 219508_at    | -1.233125081 |
| IL20RA   | 222829_s_at  | -1.311578295 |
| NA       | 226560_at    | -1.214669415 |
| CPM      | 241765_at    | -2.281694551 |
| BLMH     | 202179_at    | -2.571112218 |
| HSPA2    | 211538_s_at  | -1.773350534 |
| ELOVL7   | 227180_at    | -1.415260605 |
| ATP2C2   | 206043_s_at  | -2.017407543 |
| CCL5     | 1555759_a_at | -1.528001093 |
| DIO2     | 203699_s_at  | -2.838097346 |
| ALOXE3   | 222383_s_at  | -1.0475006   |
| CYP4B1   | 210096_at    | -3.908004007 |
| PTPN21   | 1320_at      | -2.234962186 |
| NA       | 243837_x_at  | -1.347541583 |
| ATP10B   | 214070_s_at  | -2.486745235 |
| NA       | 227735_s_at  | -1.984049713 |
| ATP7A    | 205197_s_at  | -1.073519331 |
| NA       | 237262_at    | -1.154495942 |
| IGFBP3   | 210095_s_at  | -1.610168618 |
| SCNN1A   | 203453_at    | -1.037614886 |



|         |             |              |
|---------|-------------|--------------|
| NA      | 236201_at   | -1.804414764 |
| CXCR2   | 207008_at   | -1.485760112 |
| HSD11B1 | 205404_at   | -2.306783884 |
| CAT     | 201432_at   | -1.041900192 |
| FARP2   | 204511_at   | -1.101789664 |
| ALDOC   | 202022_at   | -1.37435966  |
| ANXA9   | 210085_s_at | -2.457933546 |
| FNTB    | 225851_at   | -1.05795663  |
| SLURP1  | 214536_at   | -3.018893858 |
| SDR16C5 | 238017_at   | -1.25513713  |
| DGAT2   | 224327_s_at | -1.227129398 |
| NOD2    | 220066_at   | -1.224470864 |
| KDM3A   | 212689_s_at | -1.129254754 |
| MYH14   | 219946_x_at | -1.089271508 |
| GSTA4   | 202967_at   | -1.012533649 |
| C6orf15 | 221100_at   | -2.897261341 |
| SPTLC3  | 227752_at   | -1.07865832  |
| DLX5    | 213707_s_at | -1.15412871  |
| ELOVL4  | 219532_at   | -1.191312254 |
| ARL5A   | 226617_at   | -1.399978316 |
| FABP4   | 203980_at   | -1.767091039 |
| MIB2    | 226644_at   | -1.015493639 |
| SASH1   | 213236_at   | -1.092895128 |
| C5orf4  | 220751_s_at | -2.123902164 |
| NA      | 222315_at   | -1.301067942 |
| CAT     | 211922_s_at | -1.18515738  |
| DEGS2   | 236496_at   | -1.647178858 |
| SGPP2   | 244780_at   | -1.542125317 |
| ALDH5A1 | 203608_at   | -2.272355129 |
| VSIG10L | 238654_at   | -1.040744957 |
| CAMK1D  | 220246_at   | -1.447724691 |
| TLE3    | 206472_s_at | -1.001003329 |
| EXPH5   | 214734_at   | -1.234562104 |
| RUNDC3A | 206196_s_at | -1.713698377 |
| TGM3    | 206004_at   | -2.882986456 |
| SRPK1   | 202199_s_at | -1.10884575  |
| ARL5A   | 218150_at   | -1.245618667 |
| TUG1    | 212337_at   | -1.129064477 |
| SLC26A9 | 242271_at   | -1.686819076 |
| FLVCR2  | 219316_s_at | -1.290736377 |
| NA      | 230085_at   | -1.017812818 |
| MAMDC2  | 228885_at   | -1.018046624 |
| EPHA4   | 227449_at   | -1.350550057 |
| PGLYRP3 | 1553059_at  | -1.424018841 |
| KCTD11  | 235857_at   | -1.163204243 |
| NA      | 239652_at   | -1.891325192 |

|              |              |              |
|--------------|--------------|--------------|
| NEAT1        | 214657_s_at  | -1.415460202 |
| MAP4K5       | 203553_s_at  | -1.013277323 |
| NA           | 230053_at    | -1.36403315  |
| KIAA0513     | 204546_at    | -1.371762196 |
| C1orf96      | 225904_at    | -1.234634088 |
| DIO2         | 210819_x_at  | -1.250199235 |
| MFAP3L       | 210492_at    | -1.530435277 |
| CCDC90A      | 227451_s_at  | -1.065128418 |
| PRICKLE1     | 226065_at    | -1.081032822 |
| PYDC1        | 243722_at    | -3.320201904 |
| MAF          | 209348_s_at  | -1.470981799 |
| PRSS23       | 226279_at    | -1.205666029 |
| NA           | 238752_at    | -3.277100666 |
| SASH1        | 41644_at     | -1.016316884 |
| NYNRIN       | 220911_s_at  | -1.043147378 |
| NFE2L3       | 236471_at    | -1.571919525 |
| PRICKLE1     | 226069_at    | -1.03033813  |
| AMACR        | 209426_s_at  | -1.366157363 |
| MFAP3L       | 210843_s_at  | -1.221512535 |
| ANXA9        | 211712_s_at  | -1.934276507 |
| NFE2L3       | 204702_s_at  | -1.878973393 |
| BLNK         | 207655_s_at  | -1.204624579 |
| SCPEP1       | 218217_at    | -1.134440974 |
| MAP1LC3A     | 227219_x_at  | -1.479274205 |
| CSNK2A2      | 203575_at    | -1.440251206 |
| TSHZ2        | 235616_at    | -1.103584793 |
| NA           | 210387_at    | -1.384856816 |
| MFAP3L       | 205442_at    | -1.529082243 |
| SLC45A4      | 225597_at    | -2.384647889 |
| ITPR1        | 203710_at    | -1.308029291 |
| FLG          | 215704_at    | -1.081818065 |
| FLG2         | 1569410_at   | -1.311064374 |
| TM7SF2       | 210130_s_at  | -1.223088291 |
| MUC15        | 227241_at    | -1.659155363 |
| LY6G6C       | 207114_at    | -1.501389361 |
| BCO2         | 232449_at    | -1.251977543 |
| LOC100132815 | 227234_at    | -1.381130697 |
| CXCL14       | 222484_s_at  | -1.051978871 |
| GCNT1        | 205505_at    | -2.109806893 |
| ASAP3        | 219103_at    | -1.430514056 |
| NLRX1        | 1553695_a_at | -1.294074625 |
| FAM43A       | 227410_at    | -1.295230148 |
| PSAPL1       | 1564333_a_at | -2.50878595  |
| GAS7         | 202192_s_at  | -1.656977649 |
| AMACR        | 209425_at    | -1.579302862 |
| NA           | 230278_at    | -1.534166867 |

|           |              |              |
|-----------|--------------|--------------|
| LOC283404 | 1558195_at   | -1.194938904 |
| VIPR1     | 205019_s_at  | -1.23638281  |
| SPRR4     | 1552620_at   | -1.496595484 |
| AKD1      | 1564002_a_at | -1.134165773 |
| ID4       | 209291_at    | -1.677659041 |
| RORA      | 235567_at    | -1.316793034 |
| DOCK9     | 215237_at    | -1.709943443 |
| GAS7      | 207704_s_at  | -1.518535441 |
| ABHD12    | 228124_at    | -1.111208191 |
| SLC23A1   | 223732_at    | -2.569410032 |
| C17orf67  | 236863_at    | -1.197012299 |
| PTPRO     | 211600_at    | -1.15765525  |
| MMP9      | 203936_s_at  | -1.591400427 |
| WDR62     | 215218_s_at  | -1.046374464 |
| DGAT2     | 226064_s_at  | -1.223097206 |
| PSORS1C1  | 220362_at    | -1.088508501 |
| ETFDH     | 33494_at     | -1.311143659 |
| EPHA4     | 229374_at    | -1.332413786 |
| CYP26B1   | 219825_at    | -1.989657989 |
| GAS7      | 202191_s_at  | -1.685470976 |
| PRSS27    | 232074_at    | -1.30101392  |
| ALOXE3    | 207708_at    | -1.039303743 |
| ST3GAL6   | 210942_s_at  | -1.078545876 |
| GGT6      | 236225_at    | -1.039285107 |
| NA        | 236297_at    | -1.419568059 |
| SCNN1B    | 205464_at    | -1.150460999 |
| CGN       | 223232_s_at  | -1.041151833 |
| NCOA1     | 209106_at    | -1.116188659 |
| NA        | 227995_at    | -1.830350274 |
| NEAT1     | 224566_at    | -1.472103473 |
| ZNF91     | 206059_at    | -1.50358971  |
| STARD5    | 213820_s_at  | -1.073478797 |
| NA        | 238755_at    | -1.386795422 |
| SH3RF2    | 243582_at    | -1.186845846 |
| CARD14    | 220598_at    | -1.054868083 |
| GCNT1     | 239761_at    | -2.25143172  |
| MGLL      | 225102_at    | -1.064613314 |
| SH3BGRL2  | 225354_s_at  | -1.331291335 |
| EPHA4     | 228948_at    | -1.35974407  |
| PCSK5     | 205560_at    | -1.229807116 |
| MAP1LC3A  | 224378_x_at  | -1.451600896 |
| BCL6      | 203140_at    | -1.038062247 |
| NA        | 239841_at    | -1.877951084 |
| NA        | 217521_at    | -2.344028826 |
| DUSP2     | 204794_at    | -1.444796795 |
| DIO2      | 211215_x_at  | -1.713677463 |

|           |              |              |
|-----------|--------------|--------------|
| ASPHD2    | 227014_at    | -1.006780824 |
| CIDEA     | 221295_at    | -1.130566711 |
| MUC15     | 227238_at    | -1.38652644  |
| KRT78     | 1553213_a_at | -1.654530809 |
| ETFDH     | 205530_at    | -1.30534157  |
| GAS7      | 211067_s_at  | -1.684858852 |
| C3orf57   | 238702_at    | -1.449936346 |
| FNTB      | 1773_at      | -1.012357341 |
| CTSA      | 200661_at    | -1.106074485 |
| RARRES1   | 206392_s_at  | -1.558223958 |
| DBP       | 209782_s_at  | -1.269507792 |
| C5orf13   | 201310_s_at  | -1.193575793 |
| ABCG4     | 207593_at    | -1.342229809 |
| LOC284242 | 1560250_s_at | -1.273528584 |
| MAP1LC3A  | 232011_s_at  | -1.54001589  |
| MGLL      | 211026_s_at  | -1.145662473 |
| SGK2      | 220357_s_at  | -1.430011752 |
| EGLN3     | 222847_s_at  | -2.492852315 |
| SLC45A4   | 225598_at    | -1.949022488 |
| ABCA12    | 215465_at    | -1.102065898 |
| PRR24     | 227325_at    | -1.04501114  |
| KLF4      | 220266_s_at  | -1.262184591 |
| NA        | 232782_at    | -1.269356104 |
| FLVCR2    | 222866_s_at  | -1.327818573 |
| BST2      | 201641_at    | -1.845166166 |
| OASL      | 210797_s_at  | -1.377508999 |
| PDPN      | 226658_at    | -1.207560569 |
| RASGRP1   | 205590_at    | -1.414916104 |
| NA        | 214807_at    | -1.505346445 |
| RASEF     | 1553186_x_at | -1.013976405 |
| RUNDC3A   | 213439_x_at  | -1.615146286 |
| NA        | 221577_x_at  | -2.053126354 |
| SMPD1     | 209420_s_at  | -1.1424455   |
| SNX21     | 1553960_at   | -1.11379616  |
| APOB      | 205108_s_at  | -1.605934046 |
| PCSK5     | 205559_s_at  | -1.070058686 |
| ACPP      | 237030_at    | -1.316520902 |
| PDZD2     | 209493_at    | -1.079631125 |
| IL1F8     | 231755_at    | -2.087436065 |
| SMAP2     | 225282_at    | -1.076699849 |
| LIN7B     | 219760_at    | -1.036736346 |
| SGPP2     | 238567_at    | -1.01109468  |
| ETV7      | 221680_s_at  | -1.108082918 |
| HSDL2     | 209513_s_at  | -1.179029472 |
| LOR       | 207720_at    | -2.695454511 |
| EPHA4     | 206114_at    | -1.228362529 |

|              |              |              |
|--------------|--------------|--------------|
| CLU          | 208792_s_at  | -1.270332105 |
| RBBP6        | 228814_at    | -1.362700967 |
| AMACR        | 209424_s_at  | -1.054560177 |
| NA           | 228959_at    | -1.124772113 |
| RORA         | 210426_x_at  | -1.308160343 |
| NA           | 241300_at    | -1.085306623 |
| GRHL1        | 1552685_a_at | -1.199990127 |
| CHRNA9       | 221107_at    | -2.267117074 |
| RORA         | 210479_s_at  | -1.267144405 |
| EGR2         | 205249_at    | -1.300271696 |
| PTPN21       | 226380_at    | -1.36162119  |
| TRIM25       | 206911_at    | -1.021010307 |
| MFAP3L       | 210493_s_at  | -1.638816609 |
| LOC100130476 | 243871_at    | -1.160399319 |
| KRT13        | 207935_s_at  | -1.465357464 |
| ABHD5        | 218739_at    | -1.138397888 |
| SEMA4G       | 219194_at    | -1.031543171 |
| EPHB6        | 204718_at    | -1.424084369 |
| VASN         | 225867_at    | -1.032510602 |
| ATP13A4      | 1557136_at   | -1.21665703  |
| PDPN         | 204879_at    | -1.072547605 |
| RARRES1      | 206391_at    | -1.087096227 |
| SH3RF2       | 235768_at    | -1.00673287  |
| LOC402778    | 1564573_at   | -1.096835189 |
| XAF1         | 228617_at    | -1.059764695 |
| RND2         | 213467_at    | -1.607432326 |
| NA           | 228567_at    | -1.517815383 |
| RARRES1      | 221872_at    | -1.374412134 |
| HS3ST6       | 239547_at    | -1.141554816 |
| ABHD12B      | 237974_at    | -1.584559359 |
| NA           | 236480_at    | -1.379993345 |
| ACOT8        | 236514_at    | -1.115166432 |
| SH3GL3       | 205637_s_at  | -1.158344984 |
| SLC37A2      | 238638_at    | -1.656943605 |
| ARHGAP26     | 205068_s_at  | -1.121722418 |
| LOC154761    | 227868_at    | -1.081847083 |
| LIN7B        | 241957_x_at  | -1.008828333 |
| FZD10        | 219764_at    | -1.521821275 |
| ANKH         | 223094_s_at  | -1.182985652 |
| PDPN         | 221898_at    | -1.168312014 |
| FMO2         | 211726_s_at  | -1.069565841 |
| FNIP2        | 225922_at    | -1.033995549 |
| EPST11       | 227609_at    | -1.240491395 |
| HPGD         | 211548_s_at  | -1.256663503 |
| PERP         | 236009_at    | -1.004143632 |
| ELOVL3       | 234513_at    | -2.767116737 |

|           |              |              |
|-----------|--------------|--------------|
| POU2F3    | 207109_at    | -1.150417909 |
| JMY       | 241985_at    | -1.308310994 |
| IL20RA    | 219115_s_at  | -1.212585458 |
| NA        | 1561530_at   | -2.167496362 |
| ARG1      | 206177_s_at  | -1.912077738 |
| HPGD      | 211549_s_at  | -1.551787401 |
| POR       | 208928_at    | -1.014167398 |
| LYPD6B    | 228360_at    | -1.033106821 |
| IDE       | 203328_x_at  | -1.104311898 |
| LPXN      | 216250_s_at  | -1.071497083 |
| LOC643923 | 1564787_at   | -1.061012276 |
| KAZALD1   | 221000_s_at  | -1.100987459 |
| SERPINA12 | 1552544_at   | -2.117600353 |
| S100A12   | 205863_at    | -1.034896999 |
| DNASE1L2  | 207192_at    | -1.897454935 |
| ANKH      | 223092_at    | -1.177703272 |
| APCDD1    | 225016_at    | -1.276384234 |
| H19       | 224646_x_at  | -1.592368933 |
| FRMPD1    | 206774_at    | -1.768038923 |
| IDE       | 217496_s_at  | -1.118333757 |
| HSDL2     | 209512_at    | -1.274481968 |
| CENPM     | 218741_at    | -1.125295919 |
| CLU       | 208791_at    | -1.412253879 |
| SLC31A1   | 236217_at    | -1.072876615 |
| PCMTD2    | 212406_s_at  | -1.073923054 |
| OTUB2     | 222878_s_at  | -1.036113713 |
| NA        | 231439_at    | -1.00288869  |
| HPGD      | 203914_x_at  | -1.124392597 |
| GAN       | 220124_at    | -1.262738591 |
| DEGS1     | 207431_s_at  | -1.018034878 |
| FABP7     | 205030_at    | -1.569491084 |
| VWF       | 202112_at    | -1.447037207 |
| SLC13A5   | 228844_at    | -1.337169641 |
| NA        | 238455_at    | -1.376671917 |
| CYP4B1    | 1555497_a_at | -1.48635794  |
| BPIL2     | 1555773_at   | -1.109188607 |
| TREX2     | 211788_s_at  | -1.342618968 |
| FOXN3     | 218031_s_at  | -1.071441008 |
| NCOA1     | 209105_at    | -1.156302057 |
| H19       | 224997_x_at  | -1.705840466 |
| ABHD5     | 213805_at    | -1.10852452  |
| USP2      | 207213_s_at  | -1.127267938 |
| NDRG2     | 214279_s_at  | -1.093645917 |
| FRMD3     | 230645_at    | -1.028358534 |
| ENDOU     | 206605_at    | -1.195072873 |
| PTGS1     | 205128_x_at  | -1.027668728 |

|       |             |              |
|-------|-------------|--------------|
| FABP7 | 205029_s_at | -1.601341916 |
| CST6  | 206595_at   | -1.056667836 |
| ACPP  | 204393_s_at | -1.424798819 |
| NA    | 212913_at   | -1.484535056 |
| DAPL1 | 229290_at   | -1.337300415 |
| CTSH  | 202295_s_at | -1.166545885 |
| GLRX  | 209276_s_at | -1.17376518  |
| GBP2  | 202748_at   | -1.172709475 |

**Table S2.** Differentially expressed genes in TINCR-deficient human epidermis. Table shows differentially expressed transcripts based on Affymetrix transcript profiling of TINCR-deficient versus normal human epidermal tissue. 557 probes passed the filtering criteria of a SAM-FDR < 0.05 and greater than 2-fold change in signal intensity in siControl versus siTINCR samples. Expression changes for each probe are normalized to mean centered signal across all samples. Columns 1 and 2 show gene symbols and Affymetrix probe identifiers (Affy ID); column 3 (Log2\_Fold.Change) indicates average expression changes based on independent biological replicates (siControl A+B; siTINCR A+B).

**Table S3****TINCR probes**

>TINCR\_1  
ttgatgtggtagcgcttcca  
>TINCR\_2  
ttgtagtagaaggcgcgctt  
>TINCR\_3  
attccttcagccagtacca  
>TINCR\_4  
caggagaagtccttccaaa  
>TINCR\_5  
tgaagcagtgatcagct  
>TINCR\_6  
aatgcctaggccttctca  
>TINCR\_7  
aacctcaaagtcacacagca  
>TINCR\_8  
tgtccttcttcttgcgat  
>TINCR\_9  
agggctgtcactgcacaaa  
>TINCR\_10  
tagcattggagagttcgga  
>TINCR\_11  
aggatattgggggtggaaat  
>TINCR\_12  
atttaaggggaagggggaaa  
>TINCR\_13  
agagttctcagaaccctt  
>TINCR\_14  
ttatttctcccagcctctg  
>TINCR\_15  
ttactatccacctgtccatg  
>TINCR\_16  
taagcaaacgcacagtctgg  
>TINCR\_17  
agttggcagatgctctgaa  
>TINCR\_18  
agtcattctgcaaagcagct  
>TINCR\_19  
acaaagtcctgggttaggca  
>TINCR\_20  
aacagacagcagcagactct  
>TINCR\_21  
tctagatacacgcatgtggc  
>TINCR\_22



```
cctgaatatgcacagggaaa
>TINCR_23
aaatgccccatttcttgcc
>TINCR_24
aaagatgtgcacaagtcctg
>TINCR_25
ctgagcagtgaggctgtcaa
>TINCR_26
agccaaaagccatctgtaa
>TINCR_27
gttggggacgcctcagttca
>TINCR_28
aaaatgctttctcccacctc
>TINCR_29
gggacaggtccaacattatt
>TINCR_30
ggtcttgacaaatgatgtg
>TINCR_31
ggaagccactttgcaactt
>TINCR_32
ttggtgatggtgacattca
>TINCR_33
tcaaagcagctctgacaact
>TINCR_34
ttccacaatagttccccttg
>TINCR_35
tccagatccaaaatcagcag
>TINCR_36
agcaggagaaaaacagactg
>TINCR_37
aaggtagtgatgactctgct
>TINCR_38
cagtacactctcaaaacagc
```

**Table S3.** Table of biotinylated probes complementary to TINCR RNA for RIA-Seq.

Table S4

| GeneID   | AffyID      | Log2_Fold.Change |
|----------|-------------|------------------|
| KRT13    | 207935_s_at | 1,932541279      |
| HNMT     | 204112_s_at | 1,841071434      |
| GABRP    | 205044_at   | 3,230175685      |
| NA       | 208596_s_at | 1,176475318      |
| IFI44L   | 204439_at   | 1,348831747      |
| VGLL1    | 215729_s_at | 1,329214586      |
| USP18    | 219211_at   | 1,1647593        |
| CYP1B1   | 202437_s_at | 1,917962837      |
| GALNT5   | 236129_at   | 2,013465056      |
| DCN      | 201893_x_at | 1,358936311      |
| NA       | 215125_s_at | 1,529643926      |
| SAMHD1   | 204502_at   | 1,136244433      |
| CDC25B   | 201853_s_at | 1,252062441      |
| SLC39A8  | 209267_s_at | 1,339606067      |
| L1CAM    | 204584_at   | 1,258130932      |
| IFIT1    | 203153_at   | 1,076375018      |
| NFKBIZ   | 223217_s_at | 1,004037191      |
| SERPINA3 | 202376_at   | 1,482895208      |
| GAS1     | 204457_s_at | 1,072415697      |
| EPCAM    | 201839_s_at | 1,083931751      |
| MFI2     | 223723_at   | 1,670397923      |
| DNER     | 226281_at   | 1,004305591      |
| KRT24    | 220267_at   | 1,67053189       |
| DEPDC1   | 235545_at   | 1,444343881      |
| MYLK     | 224823_at   | 1,981379137      |
| DPP4     | 203717_at   | 1,290643741      |
| RARRES1  | 221872_at   | 1,136702509      |
| GCNT2    | 230788_at   | 1,949031511      |
| RARRES1  | 206392_s_at | 1,264294721      |
| HOTAIR   | 239153_at   | 1,136009522      |
| SLC39A8  | 219869_s_at | 1,369731457      |
| BID      | 204493_at   | 1,121169933      |
| NHEDC2   | 229491_at   | 1,030359929      |
| GOLM1    | 217771_at   | 1,041408642      |
| RARRES1  | 206391_at   | 1,169862019      |
| NEFL     | 221805_at   | 1,00616681       |
| GXYLT2   | 235371_at   | 1,242928928      |
| IL8      | 202859_x_at | 1,310725194      |
| GAL      | 214240_at   | 1,308987608      |
| NA       | 206094_x_at | 1,188756854      |
| CYP1B1   | 202436_s_at | 1,185938794      |
| EMP1     | 213895_at   | 1,422159715      |
| CCND1    | 208712_at   | 1,06404397       |

|         |              |             |
|---------|--------------|-------------|
| KRT31   | 206677_at    | 1,399733342 |
| KLRG2   | 244264_at    | 1,558297051 |
| PKIB    | 231120_x_at  | 1,42981872  |
| KRT19   | 201650_at    | 2,396142317 |
| NA      | 214456_x_at  | 1,131099822 |
| COPZ2   | 219561_at    | 1,000401148 |
| KRT7    | 209016_s_at  | 1,166150664 |
| AP1S3   | 1555731_a_at | 1,154097573 |
| GTSE1   | 215942_s_at  | 1,318788433 |
| MYCN    | 209757_s_at  | 1,626365639 |
| CCNA2   | 213226_at    | 1,048096341 |
| BHLHE41 | 221530_s_at  | 1,703364162 |
| GUCY1A3 | 229530_at    | 1,369686402 |
| GALNT5  | 229555_at    | 1,387599289 |
| ANLN    | 222608_s_at  | 1,058936815 |
| TRIM2   | 215945_s_at  | 1,081104087 |
| QDPR    | 209123_at    | 1,07629306  |
| PFAS    | 213302_at    | 1,002912871 |
| WNT5B   | 221029_s_at  | 1,223142011 |
| PLXNC1  | 213241_at    | 1,657788729 |
| SNX10   | 218404_at    | 1,034414242 |
| MLANA   | 206426_at    | 1,041480703 |
| MLANA   | 206427_s_at  | 1,120666127 |
| GUCY1A3 | 221942_s_at  | 1,308829555 |
| GUCY1A3 | 227235_at    | 1,102191808 |
| IPW     | 221974_at    | 1,159493008 |
| CCNA2   | 203418_at    | 1,15192445  |
| CDKN3   | 1555758_a_at | 1,341938057 |
| FBLN1   | 202995_s_at  | 1,084595319 |
| MYLK    | 202555_s_at  | 1,051111692 |
| FAH     | 202862_at    | 1,104613534 |
| AURKA   | 204092_s_at  | 1,000288654 |
| EFEMP1  | 201843_s_at  | 1,366112037 |
| CTGF    | 209101_at    | 1,919676311 |
| PAPSS2  | 203060_s_at  | 1,062761554 |
| ANLN    | 1552619_a_at | 1,015174627 |
| NA      | 208607_s_at  | 1,21349766  |
| PTHLH   | 206300_s_at  | 1,090769451 |
| CEP55   | 218542_at    | 1,027397205 |
| IL8     | 211506_s_at  | 1,486576839 |
| LRAT    | 220317_at    | 1,151015721 |
| KRT15   | 204734_at    | 1,327469743 |
| KIF14   | 206364_at    | 1,130198033 |
| PKIB    | 223551_at    | 1,186336899 |
| CCNB1   | 228729_at    | 1,311694786 |
| DPP4    | 203716_s_at  | 1,390430968 |

|          |             |             |
|----------|-------------|-------------|
| UBE2S    | 202779_s_at | 1,076050404 |
| NA       | 1556773_at  | 1,065714455 |
| PAPPA    | 228128_x_at | 1,625106429 |
| PTHLH    | 211756_at   | 1,068721048 |
| CDCA3    | 221436_s_at | 1,098817344 |
| NEIL3    | 219502_at   | 1,000201173 |
| KIF20A   | 218755_at   | 1,149541529 |
| CDC6     | 203968_s_at | 1,140850133 |
| NA       | 202759_s_at | 1,007210917 |
| PEG10    | 212094_at   | 1,015548101 |
| LMNB1    | 203276_at   | 1,0011208   |
| SPARC    | 212667_at   | 1,133525217 |
| RASL11B  | 219142_at   | 1,201386443 |
| DEPDC1   | 232278_s_at | 1,177507513 |
| DSG4     | 1561330_at  | 1,105897993 |
| AURKA    | 208079_s_at | 1,053005778 |
| THBS2    | 203083_at   | 1,16166739  |
| GTSE1    | 204318_s_at | 1,171529448 |
| CLDN7    | 202790_at   | 1,087471468 |
| TPM2     | 204083_s_at | 1,004805038 |
| GNG11    | 204115_at   | 1,096768887 |
| CXCL11   | 211122_s_at | 1,332131031 |
| CXCL1    | 204470_at   | 1,230774038 |
| CMPK2    | 226702_at   | 1,024170941 |
| NA       | 221059_s_at | 1,037246019 |
| GSTM3    | 202554_s_at | 1,039449326 |
| ADORA2B  | 205891_at   | 1,497898883 |
| COTL1    | 224583_at   | 1,078218301 |
| BUB1B    | 203755_at   | 1,077160167 |
| DKK1     | 204602_at   | 1,156139715 |
| CCNB1    | 214710_s_at | 1,032592994 |
| NA       | 227051_at   | 1,111896617 |
| PBK      | 219148_at   | 1,055538009 |
| POPDC3   | 219926_at   | 1,205182312 |
| NRG1     | 206343_s_at | 1,038871974 |
| FANCD2   | 242560_at   | 1,09595528  |
| DLGAP5   | 203764_at   | 1,079581384 |
| DEPDC1   | 222958_s_at | 1,000144937 |
| SLITRK6  | 232176_at   | 1,049223979 |
| APOBEC3G | 204205_at   | 1,120006108 |
| HMMR     | 207165_at   | 1,074450156 |
| NA       | 226237_at   | 1,115720546 |
| CDKN3    | 209714_s_at | 1,020571554 |
| PAPPA    | 224941_at   | 1,182330416 |
| KIF4A    | 218355_at   | 1,075407574 |
| CELF2    | 202158_s_at | 1,01238389  |

|        |              |              |
|--------|--------------|--------------|
| HELLS  | 223556_at    | 1,012555558  |
| BIRC5  | 202094_at    | 1,094574759  |
| CDC6   | 203967_at    | 1,005711841  |
| MND1   | 223700_at    | 1,173130142  |
| FST    | 226847_at    | 1,135551685  |
| NA     | 231628_s_at  | 1,097242067  |
| LCE2B  | 207710_at    | -7,967759822 |
| ARG1   | 206177_s_at  | -8,370676674 |
| LOR    | 207720_at    | -8,881187086 |
| LCE1B  | 1560531_at   | -6,77860731  |
| LYNX1  | 1554179_s_at | -3,857068297 |
| FRY    | 204072_s_at  | -2,722797932 |
| GPX3   | 214091_s_at  | -3,449737582 |
| GPX3   | 201348_at    | -3,542892976 |
| RFTN1  | 1569787_at   | -3,764176943 |
| NA     | 217521_at    | -5,138342823 |
| LCE3D  | 224328_s_at  | -3,770430716 |
| AMDHD1 | 229596_at    | -3,045520772 |
| CYFIP2 | 215785_s_at  | -2,570385242 |
| RNASE7 | 234700_s_at  | -4,138376263 |
| CARD18 | 231733_at    | -2,190127351 |
| ELMOD1 | 231930_at    | -5,297231768 |
| CD36   | 228766_at    | -4,538143127 |
| IL1F7  | 221470_s_at  | -3,492958259 |
| GLRX   | 206662_at    | -2,630428182 |
| RNASE7 | 234699_at    | -3,855532509 |
| HPGD   | 203913_s_at  | -4,827074279 |
| ASPRV1 | 235514_at    | -5,34591223  |
| CNFN   | 224329_s_at  | -3,284291233 |
| AZGP1  | 209309_at    | -4,02312702  |
| HMOX1  | 203665_at    | -3,602411339 |
| RORA   | 210479_s_at  | -3,314719098 |
| ANXA9  | 211712_s_at  | -3,378383319 |
| ELF5   | 220625_s_at  | -3,711346095 |
| GLRX   | 209276_s_at  | -2,848289893 |
| HS3ST6 | 239547_at    | -3,229151567 |
| RNASE7 | 233488_at    | -3,641295463 |
| RORA   | 210426_x_at  | -3,390065574 |
| TPRG1  | 229764_at    | -2,874755292 |
| HAL    | 206643_at    | -6,948896535 |
| DHRS9  | 223952_x_at  | -2,830481474 |
| NA     | 239136_at    | -3,377933123 |
| HPGD   | 203914_x_at  | -4,708234705 |
| DHRS9  | 224009_x_at  | -2,860125687 |
| FLG    | 215704_at    | -4,890986302 |
| CDSN   | 206193_s_at  | -3,366302562 |

|           |              |              |
|-----------|--------------|--------------|
| SLC16A10  | 222939_s_at  | -3,354905503 |
| C1orf46   | 216935_at    | -4,201045323 |
| LYPD5     | 236039_at    | -2,405850896 |
| ATP6V1C2  | 1553989_a_at | -2,957020301 |
| AADAC     | 205969_at    | -3,559087731 |
| IL1F7     | 224555_x_at  | -1,95023588  |
| CD36      | 209555_s_at  | -5,16142662  |
| SPRR2G    | 236119_s_at  | -3,4265924   |
| PYDC1     | 243722_at    | -3,232034797 |
| ALOX12B   | 207381_at    | -3,810977885 |
| KRT2      | 207908_at    | -7,573150452 |
| HPGD      | 211549_s_at  | -4,74313868  |
| ZNF662    | 228538_at    | -2,564380156 |
| FLG2      | 1569410_at   | -6,728172609 |
| CPM       | 206100_at    | -3,040518214 |
| DHRS9     | 219799_s_at  | -2,132604826 |
| SLC46A2   | 223816_at    | -4,310253628 |
| ESYT3     | 1554912_at   | -3,043394175 |
| HPGD      | 211548_s_at  | -4,78120275  |
| SLURP1    | 214536_at    | -4,073678213 |
| CD36      | 206488_s_at  | -5,133812461 |
| LY6G6C    | 207114_at    | -2,731332874 |
| GRAMD1C   | 219313_at    | -1,855848819 |
| NA        | 243176_at    | -1,51099164  |
| RPTN      | 1553454_at   | -5,95851638  |
| CIDEA     | 221295_at    | -2,234898051 |
| PCSK6     | 210553_x_at  | -1,790697635 |
| MGLL      | 211026_s_at  | -1,476502953 |
| APOB      | 205108_s_at  | -3,452009228 |
| WFDC5     | 242204_at    | -2,351645428 |
| ABHD12B   | 237974_at    | -4,183437961 |
| LCE1E     | 1559224_at   | -2,357785996 |
| CDSN      | 206192_at    | -3,134699747 |
| KCTD4     | 239787_at    | -4,181632561 |
| CYP4F22   | 244692_at    | -3,99667622  |
| ELOVL4    | 219532_at    | -1,907897747 |
| AZGP1     | 217014_s_at  | -3,662135839 |
| NA        | 206655_s_at  | -2,288951983 |
| AADA2L2   | 240420_at    | -4,913641264 |
| EPHB6     | 204718_at    | -2,136425237 |
| GDPD3     | 219722_s_at  | -1,965218603 |
| WFDC12    | 1553081_at   | -2,580356795 |
| NA        | 219095_at    | -1,595588202 |
| SMPD3     | 219695_at    | -3,404594708 |
| LOC283404 | 1558195_at   | -2,173939445 |
| DEGS2     | 236496_at    | -2,218778352 |

|          |              |              |
|----------|--------------|--------------|
| SERPINB4 | 211906_s_at  | -2,237541063 |
| EGR3     | 206115_at    | -2,082488939 |
| BPIL2    | 1555773_at   | -3,057560512 |
| ATP10B   | 214070_s_at  | -2,851599089 |
| KRT78    | 1553213_a_at | -3,239179201 |
| TREX2    | 211788_s_at  | -3,593492296 |
| ALOXE3   | 207708_at    | -1,655494435 |
| EPS8L1   | 91826_at     | -1,213686079 |
| ELOVL7   | 227180_at    | -1,983072744 |
| ELOVL3   | 234513_at    | -3,458585114 |
| EXPH5    | 214734_at    | -1,613525876 |
| EXPH5    | 213929_at    | -1,813345643 |
| USP2     | 229337_at    | -2,866078646 |
| PTGER3   | 213933_at    | -4,836892596 |
| GAS7     | 202191_s_at  | -2,046459147 |
| FILIP1L  | 204135_at    | -1,286651954 |
| PLBD1    | 218454_at    | -2,082519945 |
| 03. Mär  | 213256_at    | -3,214465084 |
| ADAP2    | 219358_s_at  | -2,372933199 |
| ACER1    | 1553929_at   | -2,847295132 |
| ANXA9    | 210085_s_at  | -3,322791619 |
| RDH12    | 242998_at    | -2,624121118 |
| TCP11L2  | 1553861_at   | -1,487104871 |
| BCO2     | 232449_at    | -1,95762279  |
| TNNT2    | 215389_s_at  | -1,757301184 |
| BLMH     | 202179_at    | -2,570959151 |
| CPM      | 235019_at    | -3,163303053 |
| TCHH     | 213780_at    | -1,723355799 |
| DGAT2    | 226064_s_at  | -1,964810854 |
| SCNN1A   | 203453_at    | -2,436660201 |
| TGM3     | 206004_at    | -2,287110805 |
| GAS7     | 202192_s_at  | -2,019347143 |
| CPM      | 235706_at    | -2,592072176 |
| NDRG4    | 209159_s_at  | -2,333141712 |
| TM7SF2   | 210130_s_at  | -2,026968912 |
| AVPI1    | 218631_at    | -1,556386147 |
| NFATC2   | 226991_at    | -2,421966751 |
| MFAP3L   | 210493_s_at  | -1,718893436 |
| SDR16C5  | 238017_at    | -1,587794954 |
| CD55     | 201926_s_at  | -1,229804776 |
| KRT77    | 237120_at    | -2,820499973 |
| SPTLC3   | 227752_at    | -1,632054612 |
| DGAT2    | 224327_s_at  | -1,813273143 |
| EGR2     | 205249_at    | -1,99831112  |
| GGCT     | 215380_s_at  | -1,839098696 |
| KIAA1199 | 212942_s_at  | -2,782225812 |

|              |              |              |
|--------------|--------------|--------------|
| PTPN21       | 40524_at     | -1,900811979 |
| VSIG10L      | 238654_at    | -2,376015069 |
| ABCG1        | 204567_s_at  | -1,460976965 |
| GABARAPL2    | 209046_s_at  | -1,321358895 |
| KRT1         | 205900_at    | -4,089176389 |
| IL22RA1      | 220056_at    | -1,695134589 |
| CYB5A        | 215726_s_at  | -1,4295404   |
| PITX1        | 208502_s_at  | -1,174683939 |
| CALML5       | 220414_at    | -1,746057124 |
| FLVCR2       | 219316_s_at  | -2,343825425 |
| LCE1E        | 1559226_x_at | -3,124810279 |
| RORA         | 236266_at    | -2,70183935  |
| ABHD12       | 228124_at    | -1,325360839 |
| ALOXE3       | 222383_s_at  | -2,196920645 |
| NEAT1        | 214657_s_at  | -1,467036696 |
| ITGAM        | 205786_s_at  | -2,645592994 |
| LOC100049716 | 228647_at    | -1,685024755 |
| KRT78        | 1553212_at   | -2,935188523 |
| ANKRD22      | 239196_at    | -1,316916837 |
| STAU1        | 207320_x_at  | -1,679630492 |
| KRT80        | 231849_at    | -1,777634618 |
| CPM          | 243403_x_at  | -2,177791269 |
| RORA         | 226682_at    | -2,634263074 |
| CHRNA9       | 221107_at    | -3,172155373 |
| CYP4B1       | 210096_at    | -2,160592068 |
| SERPINA12    | 1552544_at   | -3,219997951 |
| HSD11B1      | 205404_at    | -1,841875851 |
| RORA         | 235567_at    | -2,514087147 |
| CITED2       | 207980_s_at  | -2,183992858 |
| DSC1         | 207324_s_at  | -2,383282407 |
| RASGRP1      | 205590_at    | -2,274238882 |
| LOC284242    | 1560250_s_at | -2,392781121 |
| CD55         | 1555950_a_at | -1,165176167 |
| POU2F3       | 207109_at    | -2,050600745 |
| SORT1        | 212807_s_at  | -1,318804175 |
| PSAPL1       | 1564333_a_at | -3,640827537 |
| CASP14       | 231722_at    | -2,623176003 |
| FCHSD1       | 226698_at    | -2,328804343 |
| HYAL4        | 220249_at    | -2,341895096 |
| ADAP2        | 222876_s_at  | -1,602736254 |
| SEMA4D       | 203528_at    | -1,582663744 |
| STAU1        | 213037_x_at  | -1,763921872 |
| BEX2         | 224367_at    | -1,023920927 |
| RAET1E       | 1552777_a_at | -1,26074538  |
| ALDH3B2      | 204942_s_at  | -1,455903892 |
| ATP7A        | 205197_s_at  | -1,273053013 |



|           |              |              |
|-----------|--------------|--------------|
| SDR9C7    | 1553077_at   | -2,349258366 |
| ABCA12    | 215465_at    | -1,551381978 |
| SPRR4     | 1552620_at   | -2,641602546 |
| ATP6V1C2  | 1552532_a_at | -2,331317284 |
| ATP2C2    | 206043_s_at  | -1,240919102 |
| STAU1     | 208948_s_at  | -1,884563088 |
| MUC15     | 227238_at    | -1,594858984 |
| ACSBG1    | 206465_at    | -2,639298379 |
| CYB5A     | 207843_x_at  | -1,235372746 |
| ST3GAL6   | 213355_at    | -1,107057629 |
| ENDOU     | 206605_at    | -1,626448449 |
| NA        | 228442_at    | -2,211147969 |
| C5orf46   | 1554195_a_at | -2,494256352 |
| MGLL      | 225102_at    | -1,253538061 |
| FLVCR2    | 222866_s_at  | -2,149807809 |
| NA        | 227735_s_at  | -2,847310251 |
| NA        | 210413_x_at  | -1,424077282 |
| CRNN      | 220090_at    | -3,551953851 |
| CSNK2A2   | 203575_at    | -1,430950328 |
| ZBTB7C    | 227782_at    | -1,668476172 |
| AMPD3     | 207992_s_at  | -1,169590516 |
| RBP7      | 238066_at    | -1,57176975  |
| ELOVL1    | 218028_at    | -1,202152491 |
| EPS8L1    | 221665_s_at  | -1,109463905 |
| HOPX      | 211597_s_at  | -1,491284288 |
| HSPB8     | 221667_s_at  | -2,018864379 |
| ELOVL1    | 57163_at     | -1,020271718 |
| ANKRD22   | 238439_at    | -1,167308341 |
| NA        | 238431_at    | -1,332296688 |
| LOC643008 | 229740_at    | -1,511865138 |
| DUOXA1    | 1555404_a_at | -1,035828961 |
| SLCO2A1   | 204368_at    | -3,224289199 |
| GAS7      | 211067_s_at  | -2,78843299  |
| IGFL2     | 231148_at    | -1,333420741 |
| CTSD      | 227863_at    | -1,608908886 |
| NA        | 209093_s_at  | -1,210312653 |
| ALDH5A1   | 203608_at    | -1,884042752 |
| RNF39     | 219916_s_at  | -1,958308669 |
| NA        | 229926_at    | -1,457880272 |
| PSG4      | 208191_x_at  | -1,43329881  |
| HPSE      | 219403_s_at  | -1,900676415 |
| CRCT1     | 220620_at    | -1,125439107 |
| NA        | 236069_at    | -1,532484212 |
| CPM       | 241765_at    | -2,971931662 |
| SLC19A3   | 239345_at    | -2,966033573 |
| SERPINB3  | 209719_x_at  | -1,108682794 |

|           |              |              |
|-----------|--------------|--------------|
| FABP7     | 205029_s_at  | -3,978793782 |
| DIO2      | 203699_s_at  | -3,641689196 |
| DUOXA1    | 1554648_a_at | -1,018476224 |
| IL1F10    | 224262_at    | -2,127638148 |
| KLK12     | 220782_x_at  | -1,167661683 |
| TP53INP2  | 224836_at    | -1,264957461 |
| NGEF      | 227240_at    | -1,006393441 |
| DIO2      | 203700_s_at  | -2,887275583 |
| NA        | 233687_s_at  | -1,420606172 |
| FABP7     | 205030_at    | -3,608308439 |
| LOC645638 | 229566_at    | -1,038501211 |
| PLAGL1    | 209318_x_at  | -1,019343393 |
| MPZL3     | 227747_at    | -1,586549451 |
| ZNF91     | 206059_at    | -1,609284859 |
| IDE       | 217496_s_at  | -1,937122688 |
| PRSS8     | 202525_at    | -1,089291468 |
| CYB561D1  | 227981_at    | -1,068439022 |
| NA        | 209767_s_at  | -1,249716641 |
| SLC30A1   | 228181_at    | -1,351248156 |
| PSG7      | 205602_x_at  | -1,770643084 |
| GSTT2     | 205439_at    | -2,007300241 |
| SH3BGRL2  | 225354_s_at  | -1,398380211 |
| KLK13     | 205783_at    | -1,043964582 |
| KIAA1239  | 230765_at    | -1,710553707 |
| C9orf169  | 1569144_a_at | -1,704265522 |
| EPS8L1    | 218779_x_at  | -1,248028322 |
| PPP2R2C   | 223574_x_at  | -1,524372168 |
| NA        | 60528_at     | -1,22903186  |
| OTUB2     | 222878_s_at  | -1,668515393 |
| YOD1      | 227309_at    | -1,874078676 |
| METTL7A   | 207761_s_at  | -2,827574734 |
| ARL5A     | 218150_at    | -1,395256838 |
| NA        | 239841_at    | -2,420324336 |
| KIAA0513  | 204546_at    | -1,5369004   |
| MUC15     | 227241_at    | -1,805643617 |
| CTSH      | 202295_s_at  | -2,396557476 |
| CST6      | 206595_at    | -2,14383939  |
| PCSK6     | 207414_s_at  | -1,618856285 |
| ARL5A     | 226617_at    | -1,47215453  |
| TGM1      | 206008_at    | -1,439951193 |
| FAM43A    | 227410_at    | -1,340988636 |
| EPHX3     | 220013_at    | -1,701557213 |
| ZNF846    | 1569157_s_at | -1,443457681 |
| NA        | 242951_at    | -1,778175379 |
| ABCG4     | 207593_at    | -1,402130623 |
| SPNS2     | 225671 at    | -2.308526131 |

|          |              |              |
|----------|--------------|--------------|
| GDA      | 224209_s_at  | -1,528814889 |
| C2orf54  | 220149_at    | -1,077444647 |
| CALML3   | 210020_x_at  | -2,82665009  |
| SGPP2    | 244780_at    | -1,034584065 |
| FILIP1L  | 1554966_a_at | -1,237842242 |
| MFAP3L   | 205442_at    | -2,333716381 |
| TMEM45A  | 219410_at    | -1,11887887  |
| SLC15A1  | 207254_at    | -1,905938651 |
| C10orf99 | 227736_at    | -2,439064981 |
| TGM5     | 207911_s_at  | -1,977044062 |
| STAU1    | 211505_s_at  | -1,797713623 |
| KLK6     | 204733_at    | -2,12362059  |
| PLCXD1   | 218951_s_at  | -1,275046334 |
| NA       | 237563_s_at  | -1,02028074  |
| FA2H     | 219429_at    | -1,70090265  |
| NA       | 228567_at    | -1,583087646 |
| SERPINB3 | 209720_s_at  | -1,269065687 |
| SMPD3    | 231732_at    | -1,906365889 |
| POF1B    | 1555383_a_at | -1,462582189 |
| NA       | 226560_at    | -1,195143634 |
| PSORS1C2 | 220635_at    | -2,907201892 |
| TTC39B   | 242477_at    | -1,226985979 |
| NA       | 236297_at    | -1,49105196  |
| DUSP1    | 201041_s_at  | -1,067391553 |
| UGCG     | 204881_s_at  | -1,132041745 |
| PAQR7    | 242123_at    | -1,163078266 |
| FAM89A   | 226448_at    | -1,023443903 |
| NA       | 243383_at    | -1,630021921 |
| NA       | 238710_at    | -1,554799705 |
| RUNDC3A  | 206196_s_at  | -1,147738609 |
| EPN3     | 220318_at    | -1,124102863 |
| NFE2L3   | 236471_at    | -1,400498219 |
| NA       | 238455_at    | -1,358481352 |
| NKPD1    | 1560430_at   | -1,158890329 |
| SH3GL3   | 205637_s_at  | -1,919083718 |
| NA       | 213448_at    | -1,110670413 |
| CEBPA    | 204039_at    | -1,188900316 |
| PDZK1IP1 | 219630_at    | -1,479403812 |
| PTPN21   | 205438_at    | -1,642010668 |
| PAQR5    | 242871_at    | -1,641953697 |
| RASSF5   | 223322_at    | -1,100331856 |
| ANKRD35  | 231118_at    | -1,221733338 |
| FAM3D    | 227676_at    | -1,147286827 |
| PCMTD2   | 212406_s_at  | -1,161701143 |
| PRSS27   | 232074_at    | -1,39019965  |
| PLXDC2   | 227276_at    | -1,609356039 |

|          |              |              |
|----------|--------------|--------------|
| HSPC159  | 219998_at    | -1,10642664  |
| EPS8L1   | 221655_x_at  | -1,097156415 |
| LRMP     | 204674_at    | -1,917731523 |
| GGT6     | 236225_at    | -1,156584851 |
| CLCN5    | 206704_at    | -1,012716129 |
| IDE      | 203328_x_at  | -1,994085562 |
| GGH      | 203560_at    | -1,314553897 |
| PTPN22   | 206060_s_at  | -1,423586901 |
| ATP12A   | 207367_at    | -1,270097393 |
| PPP2R2C  | 228010_at    | -1,675913187 |
| PDZK1IP1 | 1553589_a_at | -1,470880455 |
| CAMK1D   | 235626_at    | -1,708261068 |
| CASZ1    | 243386_at    | -1,085962183 |
| BSPRY    | 218792_s_at  | -1,002996091 |
| SLC39A2  | 220413_at    | -1,771760593 |
| NA       | 239736_at    | -1,654490287 |
| ACPP     | 204393_s_at  | -1,9645085   |
| LASS3    | 1554253_a_at | -1,339415417 |
| DUOX1    | 219597_s_at  | -1,022678131 |
| SP6      | 228975_at    | -1,175044653 |
| CLN8     | 219341_at    | -1,038401401 |
| XKRX     | 230349_at    | -1,776709259 |
| NA       | 214807_at    | -1,510235317 |
| APPL2    | 218218_at    | -1,050404633 |
| CPEB4    | 224828_at    | -1,131096978 |
| EGLN3    | 222847_s_at  | -1,387004428 |
| NA       | 230003_at    | -1,59049602  |
| CXCR2    | 207008_at    | -2,233800202 |
| CITED2   | 209357_at    | -1,459759183 |
| RBBP6    | 1552329_at   | -1,524804214 |
| SLC5A10  | 239707_at    | -1,576019775 |
| TMPRSS13 | 223659_at    | -1,448047913 |
| TMEM86A  | 242103_at    | -1,317154565 |
| MAP1LC3A | 224378_x_at  | -1,306288777 |
| NA       | 228717_at    | -1,200596564 |
| DLX5     | 213707_s_at  | -1,160618504 |
| IL1R2    | 205403_at    | -1,839073842 |
| NA       | 226959_at    | -1,452370502 |
| NLRP10   | 1553534_at   | -1,374408867 |
| DNASE1L2 | 207192_at    | -1,975532269 |
| MAP3K8   | 205027_s_at  | -1,406045145 |
| PLIN2    | 209122_at    | -1,016180733 |
| CYB5A    | 209366_x_at  | -1,205380807 |
| AQP9     | 205568_at    | -1,249714089 |
| SPINK7   | 223720_at    | -1,785196852 |
| PLA2G3   | 220780_at    | -1,608661934 |

|              |              |              |
|--------------|--------------|--------------|
| DLX3         | 231778_at    | -1,397537497 |
| GPT2         | 224839_s_at  | -1,182898511 |
| FGD3         | 227811_at    | -1,145820022 |
| GPR1         | 214605_x_at  | -1,061897487 |
| SORCS2       | 228720_at    | -1,190008316 |
| ST3GAL6      | 210942_s_at  | -1,081513286 |
| KRT9         | 208188_at    | -2,607704906 |
| VASN         | 225867_at    | -1,593162276 |
| SPINK5       | 205185_at    | -1,119513407 |
| TNFRSF11A    | 238846_at    | -1,305291166 |
| C15orf62     | 1569065_s_at | -1,736447406 |
| TMEM184A     | 1558281_a_at | -1,010242134 |
| GBAP1        | 210589_s_at  | -1,041708357 |
| SLC45A4      | 225597_at    | -1,032990791 |
| SBSN         | 235272_at    | -1,043600034 |
| MAP1LC3A     | 232011_s_at  | -1,431039101 |
| TTC39A       | 210652_s_at  | -1,183973217 |
| NAP1L5       | 228062_at    | -1,300310875 |
| ULK3         | 225067_at    | -1,212454845 |
| MXD1         | 228846_at    | -1,063101524 |
| POR          | 208928_at    | -1,149875141 |
| TMEM86A      | 227570_at    | -1,263044027 |
| PIK3C2B      | 204484_at    | -1,140207898 |
| ZRANB1       | 225131_at    | -1,009768422 |
| SASH1        | 213236_at    | -1,029627655 |
| TCEA3        | 226388_at    | -1,532092852 |
| PTGS1        | 238669_at    | -1,303485594 |
| STX19        | 1555173_at   | -1,042638189 |
| GAN          | 220124_at    | -1,110817033 |
| SLC5A1       | 206628_at    | -1,10364559  |
| NA           | 226865_at    | -1,526801074 |
| PTPN21       | 1320_at      | -1,150540228 |
| LOC100129122 | 231062_at    | -1,379318776 |
| SOX7         | 228698_at    | -1,085128494 |
| NA           | 226382_at    | -1,6254696   |
| ARHGEF10L    | 221656_s_at  | -1,085256537 |
| PTGS1        | 205128_x_at  | -1,061759162 |
| NA           | 214945_at    | -1,190416607 |
| S100A7       | 205916_at    | -1,101961791 |
| IDE          | 203327_at    | -1,13011463  |
| LOC100130476 | 243871_at    | -1,476508268 |
| PAWR         | 204005_s_at  | -1,044913305 |
| ARG2         | 203946_s_at  | -1,250823477 |
| ABHD5        | 218739_at    | -1,159708605 |
| CYP4B1       | 1555497_a_at | -1,46088574  |
| SCNN1B       | 205464_at    | -1,306297554 |

|          |             |              |
|----------|-------------|--------------|
| EREGL    | 205767_at   | -1,187433865 |
| C6orf15  | 221100_at   | -1,197188434 |
| ARRDC4   | 225283_at   | -1,165955876 |
| CARD14   | 220599_s_at | -1,071114514 |
| PSG1     | 208257_x_at | -1,111188582 |
| TTC39B   | 232000_at   | -1,120923244 |
| HSDL2    | 209513_s_at | -1,270192332 |
| GCNT1    | 205505_at   | -1,326595057 |
| NA       | 227995_at   | -1,368349759 |
| SOX2     | 228038_at   | -1,122803757 |
| C5orf4   | 220751_s_at | -1,327835961 |
| SOX7     | 224013_s_at | -1,037332265 |
| MAPK14   | 211561_x_at | -1,02105249  |
| IL1R2    | 211372_s_at | -1,675310713 |
| HSDL2    | 209512_at   | -1,288604559 |
| C1orf210 | 1554246_at  | -1,239361488 |
| FMO2     | 228268_at   | -1,947206823 |
| IL1F5    | 222223_s_at | -1,133188141 |
| JMY      | 241985_at   | -1,833364334 |
| C15orf48 | 223484_at   | -1,473570221 |
| SEC14L1  | 202083_s_at | -1,022281561 |
| C1orf68  | 217087_at   | -1,459900441 |
| PDZD2    | 209493_at   | -1,071440349 |
| NA       | 244417_at   | -1,481392916 |
| SLC22A3  | 205421_at   | -1,31017902  |
| GBP2     | 202748_at   | -1,219308396 |
| PTGS1    | 215813_s_at | -1,399229206 |
| EGF      | 206254_at   | -1,275542143 |
| GK       | 215977_x_at | -1,14895462  |
| SORT1    | 224818_at   | -1,090956911 |
| KIAA1370 | 225327_at   | -1,03900251  |
| C6orf105 | 229070_at   | -1,248078608 |
| SNX21    | 1553960_at  | -1,11901031  |
| GCNT1    | 239761_at   | -1,475026981 |
| HOMER2   | 217080_s_at | -1,364593527 |
| NA       | 241300_at   | -1,098091    |
| C5orf4   | 48031_r_at  | -1,107783683 |
| GK       | 207387_s_at | -1,515926616 |
| SLC37A2  | 238638_at   | -1,128012811 |
| PCOTH    | 222277_at   | -1,007075505 |
| SNTB1    | 226438_at   | -1,229746472 |
| SLC31A1  | 236217_at   | -1,120495459 |
| NA       | 239885_at   | -1,130262606 |
| DSG1     | 206642_at   | -1,191805422 |
| NDRG2    | 214279_s_at | -1,239158096 |
| OASL     | 205660_at   | -1,16253169  |

|          |             |              |
|----------|-------------|--------------|
| KCNK7    | 224055_x_at | -1,071804522 |
| TGM2     | 201042_at   | -1,582246853 |
| LRRC20   | 218550_s_at | -1,059049555 |
| C3orf57  | 238702_at   | -1,525586254 |
| G0S2     | 213524_s_at | -1,087107964 |
| CST6     | 231248_at   | -1,186401732 |
| NA       | 221861_at   | -1,008956556 |
| IL1F8    | 231755_at   | -1,768471588 |
| PGLYRP3  | 1553059_at  | -1,065966016 |
| GK       | 214681_at   | -1,125921459 |
| KIAA1644 | 221901_at   | -1,11178254  |
| MALAT1   | 224559_at   | -1,116926464 |
| NELL2    | 203413_at   | -1,213629687 |
| PRR9     | 237732_at   | -1,473874367 |

**Table S4.** Differentially expressed genes in STAU1-deficient human epidermis. Table shows differentially expressed transcripts based on Affymetrix transcript profiling of STAU1-deficient versus normal human epidermal tissue. 609 probes passed the filtering criteria of a SAM-FDR < 0.05 and greater than 2-fold change in signal intensity in siControl versus siTINCR samples. Expression changes for each probe are normalized to mean centered signal across all samples. Columns 1 and 2 show gene symbols and Affymetrix probe identifiers (Affy ID); column 3 (Log2\_Fold.Change) indicates average expression changes based on independent biological replicates (siControl A+B; siSTAU1 A+B).

**TINCR box motifs**

>TINCR BOX 1 (antisense - yellow)  
CATGGAGGGGCTGCGGCGGGGGCTG

>TINCR BOX 2 (sense - blue)  
ACACTCCTGCTGGAGCCCCAGTCCC

>TINCR BOX 3 (antisense)  
AGCACAGAAGGGGCAGGAGAGACAC

>TINCR BOX 4 (antisense)  
GAAGGAGGGGAAGAGAGAGGAGCCC

>TINCR BOX 5 (sense)  
ATCCCCCTCCACCTCTCCCCTTGGT

>TINCR BOX 6 (antisense)  
GGTGGAGGAAGTGGGGAAGGGTTTC

>TINCR BOX 7 (sense)  
TTTTCTTTCTTCCTTCACATCATT

>TINCR BOX 8 (antisense)  
GGGGAGATGACAGTGGCTGGAGTTG

>TINCR BOX 9 (sense)  
GTTTTTCTCCTGCTACTCCATCCAT

>TINCR BOX 10 (sense)  
CAGTCTCACCTTCTGACTCACTCGG

**Table S5.** Table depicting the 10 TINCR box motifs present in the TINCR transcript.



| miR ID  | number of sites in TINCR | % of sites in background | % of sites in RIA-seq target set |
|---------|--------------------------|--------------------------|----------------------------------|
| miR-15  | 4                        | 15.5%                    | 15.5%                            |
| miR-28  | 4                        | 10.0%                    | 9.7%                             |
| miR-186 | 4                        | 16.9%                    | 18.0%                            |
| miR-766 | 4                        | 15.7%                    | 14.5%                            |

**Table S6.** RIA-seq targets do not have significantly more miRNA binding sites than background. We searched for potential M2-8 7-mer miRNA binding sites in full length TINCR (As a non-coding RNA, TINCR does not have a well defined 3' UTR). Of eight miRNA seeds that have four or more binding sites in TINCR, only four of them (miR-15, miR-28, miR-186, and miR-766) are expressed in keratinocytes. For each of the four miRNA seeds, we then searched for their binding sites in RIA-seq targets, and compared the number of binding sites to that in 3' UTRs of all RefSeq genes.

| miR ID  | number of sites in TINCR | % of sites in background | % of sites in down-regulated genes upon TINCR knockdown | % of sites in up-regulated genes upon TINCR knockdown |
|---------|--------------------------|--------------------------|---------------------------------------------------------|-------------------------------------------------------|
| miR-15  | 4                        | 15.5%                    | 15.8%                                                   | 17.9%                                                 |
| miR-28  | 4                        | 10.0%                    | 11.8%                                                   | 7.7%                                                  |
| miR-186 | 4                        | 16.9%                    | 15.8%                                                   | 21.8%                                                 |
| miR-766 | 4                        | 15.7%                    | 15.5%                                                   | 19.2%                                                 |

**Table S7.** Down-regulated or up-regulated genes upon TINCR knock down do not have significantly more miRNA binding sites than background controls. The percentage of miRNA binding sites is not significantly different from what is observed in the background set.

**Table S8**

| <b>GeneSymbol</b> | <b>RIA-seq-EnrichmentScore</b> | <b>siTINCR_fold_change</b> | <b>siSTAU_fold_change</b> |
|-------------------|--------------------------------|----------------------------|---------------------------|
| DSG4              | 0                              | 2,473607488                | 2,152328062               |
| PTGER3            | 0                              | 0,121129488                | 0,034990508               |
| ARHGEF10L         | 0,402623091                    | 0,502103521                | 0,471308453               |
| ITGAM             | 0                              | 0,053275869                | 0,159807498               |
| LYPD6B            | 0,315096332                    | 0,4886567                  | 0,655062214               |
| UGCG              | 2,409950998                    | 0,809032461                | 0,456269542               |
| L1CAM             | 0                              | 1,858990463                | 2,391856656               |
| TGM1              | 3,623607817                    | 0,738771819                | 0,368579773               |
| SH3RF2            | 0                              | 0,46755586                 | 0,746302074               |
| EDN1              | 0                              | 2,307895509                | 1,645592273               |
| PDPN              | 0,044735899                    | 0,450789746                | 0,764563504               |
| PLCXD1            | 0,645522589                    | 0,611424787                | 0,413211888               |
| PAQR7             | 3,019673181                    | 0,526907482                | 0,4465587                 |
| CREB3L2           | 0,376554843                    | 0,492760638                | 0,551703568               |
| BLNK              | 0,376554843                    | 0,433882235                | 0,525510967               |
| PDZK1IP1          | 0                              | 0,199116216                | 0,359697956               |
| SOX7              | 3,012438747                    | 0,605118016                | 0,479223187               |
| BID               | 0                              | 1,640215556                | 2,175232985               |
| C9orf64           | 0                              | 2,071387494                | 1,429049474               |
| GGH               | 0,04645651                     | 0,550974548                | 0,402049796               |
| CRTAM             | 0                              | 3,549477968                | 0,635880101               |
| CXCL14            | 0,345105506                    | 0,482306156                | 0,599474683               |
| SEC24D            | 0,241573854                    | 2,011296357                | 0,94956547                |
| SGPP2             | 2,25932906                     | 0,412764271                | 0,488156598               |
| AP1S3             | 0                              | 1,711578745                | 2,225450749               |
| DBP               | 0,301967318                    | 0,414801268                | 0,569614194               |
| HSPB8             | 0,334486875                    | 0,597749034                | 0,246752331               |
| PCMTD2            | 3,623607817                    | 0,475025526                | 0,446985166               |
| DNAH14            | 0                              | 2,095035824                | 1,358319767               |
| KLK6              | 1,204975499                    | 0,591488988                | 0,22947031                |
| SLC23A1           | 0                              | 0,168473078                | 0,430728052               |
| FRMD3             | 0                              | 0,490267647                | 0,944365809               |
| ANXA1             | 0,174140662                    | 2,485759777                | 1,222016029               |
| PLA2G3            | 0                              | 0,640969066                | 0,327902332               |
| HMOX1             | 0                              | 0,62673076                 | 0,082331519               |
| C1orf96           | 1,506219374                    | 0,424950266                | 0,544940667               |
| CITED2            | 3,012438747                    | 0,653655143                | 0,282852922               |
| GUCY1A3           | 0                              | 1,208767365                | 2,395349085               |
| KRT9              | 0                              | 0,117653234                | 0,164059961               |
| CALML5            | 0,695178172                    | 0,404432845                | 0,298115414               |
| TREX2             | 0                              | 0,394304214                | 0,082842087               |
| S100P             | 0,690211013                    | 2,155530847                | 0,612836897               |
| ERAP2             | 0                              | 2,227181901                | 1,482805246               |
| C15orf48          | 0                              | 0,898979094                | 0,360090085               |
| PFAS              | 0                              | 1,430564209                | 2,004042176               |

|           |             |             |             |
|-----------|-------------|-------------|-------------|
| CCNB1     | 0           | 1,519348328 | 2,2534632   |
| PADI1     | 7,247215635 | 0,177471128 | 0,493349866 |
| ALOXE3    | 9,037316241 | 0,485181965 | 0,263119935 |
| IKBIP     | 0           | 2,219931355 | 1,411379601 |
| HOTAIR    | 6,024877494 | 1,627643234 | 2,197722941 |
| COTL1     | 9,037316241 | 2,333234882 | 2,1114269   |
| UPK1A     | 1,004146249 | 0,172804537 | 0,533492423 |
| SIGLEC15  | 0           | 0,417229142 | 0,777789343 |
| ABHD5     | 1,207869272 | 0,458991326 | 0,447602933 |
| C12orf28  | 0           | 0,415671619 | 0,566155183 |
| DOCK9     | 2,612368426 | 0,305672052 | 0,497457554 |
| C17orf67  | 0           | 0,436177634 | 0,652380975 |
| TAF1A     | 0           | 2,051966882 | 1,630313112 |
| MYH14     | 0           | 0,426652375 | 0,847100367 |
| KCNE1     | 0,430348392 | 0,358757604 | 0,737683702 |
| GADD45G   | 0           | 0,486122146 | 0,587467333 |
| DEPDC7    | 0           | 2,297565318 | 1,82343254  |
| GDA       | 0           | 0,53498732  | 0,346561936 |
| AQP9      | 0,374855981 | 0,563583395 | 0,42053154  |
| SEMA4D    | 2,818361636 | 0,305367621 | 0,333864882 |
| TUG1      | 0,87845038  | 0,457212111 | 0,950153878 |
| GOLM1     | 0           | 1,613758838 | 2,058236326 |
| FABP7     | 0           | 0,333228454 | 0,072115285 |
| PRR24     | 0           | 0,484641166 | 0,535198733 |
| UBE2S     | 0           | 1,569684052 | 2,108256502 |
| LMNB1     | 0           | 1,302026606 | 2,001554363 |
| ATP2C2    | 12,68262736 | 0,312247037 | 0,423103023 |
| SERPINA12 | 0           | 0,23042987  | 0,107320832 |
| AAACL2    | 0,167357708 | 0,108785914 | 0,033177724 |
| TPRG1     | 0,430348392 | 0,604539904 | 0,13633659  |
| GK        | 0,603934636 | 0,793578    | 0,416503089 |
| KRT80     | 7,394167834 | 0,446500787 | 0,2916612   |
| MGLL      | 0           | 0,464858038 | 0,388228919 |
| SRPK1     | 0,100655773 | 0,463664845 | 0,563171643 |
| SASH1     | 1,028925677 | 0,48142868  | 0,489836554 |
| RORA      | 2,78071269  | 0,403266307 | 0,132954559 |
| AKD1      | 0           | 0,455598287 | 0,579592821 |
| PIK3C2B   | 19,32590836 | 0,710202755 | 0,453694194 |
| ENDOU     | 0           | 0,436764386 | 0,323884549 |
| KIAA1199  | 0           | 0,419285014 | 0,14536725  |
| FRY       | 0,402623091 | 0,243290933 | 0,151480298 |
| KCTD4     | 2,415738545 | 2,385332307 | 0,055106543 |
| TMEM184A  | 0           | 0,703847447 | 0,496462917 |
| BST2      | 0           | 0,278323346 | 1,951838514 |
| CYP4F22   | 0,645522589 | 0,40967546  | 0,062644158 |
| SLC31A1   | 9,662954179 | 0,475370205 | 0,459935844 |
| PTPN22    | 0           | 1,126163015 | 0,372784324 |
| NGEF      | 0           | 0,71493406  | 0,497789105 |

|           |             |             |             |
|-----------|-------------|-------------|-------------|
| CMPK2     | 0           | 0,559004902 | 2,03379031  |
| SCPEP1    | 0,805246182 | 0,455511387 | 0,729945036 |
| CDC25B    | 0           | 1,400131517 | 2,381816783 |
| CLN8      | 0           | 0,626562637 | 0,486866655 |
| TGM2      | 0           | 0,635751375 | 0,333961372 |
| CDCA3     | 0           | 1,191605867 | 2,141790463 |
| GPR137B   | 0           | 0,424921081 | 0,558301273 |
| HNMT      | 0           | 1,668795935 | 3,582760074 |
| BLMH      | 0           | 0,168274419 | 0,168292274 |
| FOXN3     | 1,66082025  | 0,475843474 | 0,799329777 |
| PAPSS2    | 0           | 1,454263601 | 2,088926243 |
| BCO2      | 0           | 0,419872282 | 0,257452326 |
| ENTPD3    | 0,603934636 | 2,014027177 | 1,161489882 |
| ASPRV1    | 0,201311545 | 0,517050713 | 0,024587822 |
| KIAA0513  | 0           | 0,386418964 | 0,344625079 |
| KIAA1644  | 0           | 0,686647499 | 0,462721956 |
| RAB7L1    | 0,603934636 | 2,03646337  | 1,352786768 |
| NOS1      | 0           | 2,434350297 | 1,67880781  |
| TMEM86A   | 0           | 0,578246835 | 0,408922883 |
| KRT1      | 3,294188925 | 0,101873027 | 0,058753704 |
| PHACTR3   | 0,042134975 | 2,309664597 | 1,564435115 |
| ABCG1     | 0,345105506 | 0,837527993 | 0,363247062 |
| FNIP2     | 1,506219374 | 0,452246451 | 0,542092981 |
| TCHH      | 0           | 0,720266207 | 0,302843468 |
| WFDC5     | 1,811803909 | 0,652580963 | 0,195922443 |
| EPN3      | 1,907162009 | 0,750646692 | 0,458787229 |
| AADAC     | 0           | 0,216296227 | 0,084841402 |
| TLE3      | 3,623607817 | 0,499652394 | 0,532621758 |
| SP6       | 0,172552753 | 0,528289369 | 0,442870052 |
| HOMER2    | 0,805246182 | 0,511469193 | 0,388343836 |
| CD55      | 0,480802332 | 0,483864815 | 0,43603309  |
| POSTN     | 0           | 0,122669506 | 0,835697118 |
| ID4       | 0           | 0,312589443 | 0,509746052 |
| ANKH      | 4,518658121 | 0,441246132 | 0,663123177 |
| ADAMTS1   | 0,690211013 | 2,541791026 | 1,369712847 |
| ALDOC     | 5,636723271 | 0,385723872 | 0,694346921 |
| VGLL3     | 2,657312399 | 2,153199969 | 1,61189109  |
| RASGRP1   | 0,402623091 | 0,375031556 | 0,20672161  |
| PLXDC2    | 0,026841539 | 0,327323949 | 0,32774461  |
| YOD1      | 0,007596662 | 0,8322797   | 0,272801092 |
| IPW       | 0           | 2,037109752 | 2,23378914  |
| LOC148189 | 0           | 2,061790845 | 1,02197474  |
| SAMHD1    | 0           | 1,227407218 | 2,198080821 |
| ANLN      | 0,226475489 | 1,349521986 | 2,052035544 |
| FAM73A    | 0,092913021 | 2,129738623 | 1,310291794 |
| UCHL1     | 0           | 2,009215038 | 1,425992909 |
| KRT4      | 0,603934636 | 0,306684956 | 0,559953189 |
| EPHX3     | 0,543541173 | 0,602391525 | 0,307454065 |

|          |             |             |             |
|----------|-------------|-------------|-------------|
| BIRC5    | 0           | 1,475299629 | 2,135501275 |
| TMEM45A  | 0,154196077 | 0,649645915 | 0,460451507 |
| PSORS1C1 | 0,603934636 | 0,470247278 | 0,65948686  |
| ELOVL3   | 0           | 0,146897654 | 0,090962448 |
| PLAT     | 0           | 2,048504515 | 2,232268839 |
| ETFDH    | 0,052516055 | 0,403812475 | 0,511111173 |
| ANKRD6   | 4,83147709  | 2,011206395 | 1,881983836 |
| SLC15A1  | 0,055785903 | 0,539628317 | 0,266842681 |
| CARD18   | 0           | 0,594381084 | 0,219132086 |
| STARD5   | 1,807463248 | 0,475171826 | 0,795510659 |
| RFTN1    | 0           | 0,064694534 | 0,073598647 |
| KLK13    | 0,805246182 | 0,761093939 | 0,484992862 |
| KRT13    | 0,049384242 | 0,362145797 | 3,817270119 |
| DPP4     | 0,017505352 | 0,766717686 | 2,532456265 |
| KLHL23   | 0           | 2,059171508 | 1,147325348 |
| MND1     | 0           | 1,540100623 | 2,255004234 |
| APPL2    | 0,010412666 | 0,51144306  | 0,482832725 |
| MIB2     | 0           | 0,494659044 | 0,662791333 |
| FARP2    | 0           | 0,465938141 | 0,591408897 |
| MYLK     | 0           | 1,175750313 | 2,860456519 |
| MXI1     | 0,058920452 | 0,376240731 | 0,570672147 |
| SPNS2    | 1,207869272 | 0,812279837 | 0,201866563 |
| ANKRD35  | 2,415738545 | 0,507463438 | 0,428767263 |
| LCE3D    | 0,483147709 | 0,964769622 | 0,073280303 |
| CLCN5    | 1,12966453  | 0,817060265 | 0,495612291 |
| LCE1B    | 0           | 0,809473643 | 0,009108269 |
| IL1R2    | 0           | 0,682955501 | 0,295823327 |
| EXPH5    | 1,204975499 | 0,42497147  | 0,30493301  |
| SERPINB4 | 0,391861951 | 0,238888093 | 0,212047435 |
| FBXL14   | 0           | 2,05352285  | 1,474624628 |
| JMY      | 0,988256677 | 0,403793336 | 0,280609482 |
| GAN      | 0,25882913  | 0,41675211  | 0,463031731 |
| ACSBG1   | 0           | 0,056242084 | 0,160506277 |
| TTC39A   | 1,610492363 | 0,975275061 | 0,440137678 |
| C2orf54  | 0           | 0,545897256 | 0,473867411 |
| IL1F5    | 0           | 0,567389907 | 0,455907124 |
| C6orf15  | 0           | 0,134226242 | 0,436124386 |
| QDPR     | 0           | 1,477660154 | 2,108611133 |
| SLCO2A1  | 0           | 0,493553302 | 0,107002084 |
| PM20D2   | 0           | 2,050201229 | 1,816322873 |
| GSTA4    | 0,033551924 | 0,495674983 | 0,507041793 |
| RNASE7   | 0,301967318 | 1,206054268 | 0,067996231 |
| IFI44L   | 0,603934636 | 0,613097295 | 2,547057885 |
| FLG2     | 0,468248881 | 0,403023432 | 0,009432314 |
| C5orf13  | 0,251639432 | 0,43721785  | 0,854851612 |
| CEACAM5  | 0           | 0,410853996 | 0,515046612 |
| C9orf150 | 2,013115454 | 2,101461648 | 1,555516867 |
| PSAT1    | 0,177202279 | 2,260730817 | 1,129454857 |

|              |             |             |             |
|--------------|-------------|-------------|-------------|
| LOC645638    | 0           | 0,338038105 | 0,486832973 |
| GDPD3        | 0           | 0,625427547 | 0,256100397 |
| PTPN21       | 3,623607817 | 0,212218179 | 0,338105575 |
| TRIM2        | 0,028521116 | 0,787909512 | 2,115654561 |
| NAP1L5       | 0,301243875 | 0,671778987 | 0,406038695 |
| SLC37A2      | 0,12049755  | 0,317110245 | 0,457545521 |
| RASAL1       | 0           | 0,303425255 | 0,524103404 |
| IFIT1        | 0,190716201 | 0,631872272 | 2,108730925 |
| CALML3       | 0,603934636 | 0,158600276 | 0,140959235 |
| LOC100049716 | 0           | 0,108812712 | 0,310997577 |
| TNFSF10      | 0,805246182 | 0,420293235 | 0,889548086 |
| SORT1        | 0,602487749 | 0,433664047 | 0,433805262 |
| PLIN2        | 0,306220379 | 0,597516361 | 0,494423516 |
| CRYAB        | 2,357560759 | 0,379019257 | 0,6003858   |
| KIAA1370     | 0,013725787 | 0,885399223 | 0,48666384  |
| NEIL3        | 0,024157385 | 1,600933604 | 2,000278904 |
| IL1F10       | 0           | 0,375235596 | 0,22883218  |
| C1orf46      | 0           | 1,009042345 | 0,054370001 |
| MUC1         | 0           | 2,480325499 | 1,351906961 |
| KLRG2        | 0           | 1,472208365 | 2,94506005  |
| NFE2L3       | 2,013115454 | 0,302404925 | 0,378798305 |
| CEP55        | 1,811803909 | 1,691841087 | 2,038343515 |
| PTHLH        | 0           | 1,546819804 | 2,113662818 |
| ITPKB        | 1,811803909 | 0,414263892 | 0,750778159 |
| CD36         | 0,150983659 | 0,035580885 | 0,032476484 |
| AZGP1        | 0,24425179  | 0,746430094 | 0,069703194 |
| TTC39B       | 0,602487749 | 0,826633792 | 0,443204793 |
| CLU          | 3,012438747 | 0,394666784 | 0,971505459 |
| SEC14L1      | 0           | 0,948825929 | 0,492337126 |
| DUSP2        | 0           | 0,367343895 | 0,646667177 |
| GLUL         | 1,207869272 | 2,046597634 | 1,659649831 |
| DEGS1        | 6,34131368  | 0,493788493 | 0,57012441  |
| COPZ2        | 0           | 1,326785165 | 2,000556187 |
| RDH12        | 0,695178172 | 0,366323743 | 0,162203728 |
| RNF39        | 1,949225072 | 0,848444814 | 0,257329959 |
| CST6         | 4,83147709  | 0,480741137 | 0,315318001 |
| ASS1         | 0,753109687 | 2,567972628 | 1,255111503 |
| NLRP10       | 0,187134676 | 1,057796137 | 0,385710716 |
| KCTD11       | 5,23410018  | 0,446519708 | 0,633984445 |
| GABRP        | 0           | 1,217997118 | 9,383822246 |
| DLX3         | 25,36525472 | 0,382664588 | 0,379576479 |
| HSPC159      | 0           | 0,638949305 | 0,46444297  |
| GALNT5       | 0           | 1,245593674 | 3,250208281 |
| CXCR2        | 0           | 0,357060361 | 0,212597981 |
| CPEB4        | 0,686289359 | 0,622856206 | 0,456568434 |
| ESYT3        | 0           | 0,87146158  | 0,121296164 |
| DGAT2        | 2,464722611 | 0,427763917 | 0,26998628  |
| HELLS        | 0           | 1,446058454 | 2,017481659 |

|          |             |             |             |
|----------|-------------|-------------|-------------|
| PLBD1    | 0,201311545 | 0,420418157 | 0,236101654 |
| SLC30A1  | 0,027576924 | 0,518032442 | 0,391952802 |
| PAQR5    | 0,201311545 | 0,569863535 | 0,320422265 |
| HYAL4    | 0           | 0,168976938 | 0,197251053 |
| APOB     | 0           | 0,328522925 | 0,091378006 |
| DLX5     | 0,603934636 | 0,449337474 | 0,447320722 |
| SMPD3    | 0           | 0,572291902 | 0,158716025 |
| POF1B    | 0,523902391 | 0,55761439  | 0,362843118 |
| RASSF5   | 0,753109687 | 0,744478126 | 0,466409198 |
| IGFBP7   | 0           | 2,106304092 | 1,825532359 |
| THBS2    | 1,204975499 | 1,666451261 | 2,23715837  |
| RASL11B  | 0           | 1,231209162 | 2,29960559  |
| DIO2     | 0           | 0,162069852 | 0,104062171 |
| DEGS2    | 0           | 0,319263857 | 0,21482319  |
| PRSS23   | 0,127144134 | 0,433569137 | 0,953024495 |
| ABHD12   | 0           | 0,462906206 | 0,399049373 |
| SLC5A10  | 0           | 0,685272722 | 0,335405959 |
| ASNS     | 1,095432272 | 2,772265559 | 0,883534865 |
| HAL      | 0,35862366  | 0,4503108   | 0,008094196 |
| MPZL3    | 0,627591406 | 0,524713125 | 0,332966872 |
| ATP7A    | 1,207869272 | 0,475158476 | 0,413783203 |
| MYCN     | 0           | 0,802136371 | 3,087342712 |
| IL22RA1  | 3,012438747 | 0,330415556 | 0,308825848 |
| STX19    | 0           | 0,635927705 | 0,485438962 |
| CASZ1    | 2,409950998 | 0,59066472  | 0,471077985 |
| MAL      | 0           | 4,22899679  | 0,604852912 |
| CXCL1    | 0           | 1,41124288  | 2,34692874  |
| NCOA1    | 0,063572067 | 0,454942034 | 0,587041778 |
| CDC6     | 0           | 1,664277045 | 2,104213346 |
| BPIL2    | 0           | 0,463554668 | 0,120110942 |
| FAH      | 0           | 1,369089034 | 2,150412656 |
| WDR62    | 0           | 0,484183404 | 0,576276622 |
| AMDHD1   | 0           | 0,240886641 | 0,121117499 |
| PAPPA    | 0           | 0,895993777 | 2,645826432 |
| NEAT1    | 1,811803909 | 0,367602418 | 0,361724521 |
| EPHA4    | 0,537935491 | 0,401155196 | 0,75943224  |
| VSIG10L  | 0,683699588 | 0,486076416 | 0,192640765 |
| IL1F8    | 0           | 0,235298485 | 0,293519532 |
| CRNN     | 0           | 0,154163421 | 0,085261967 |
| KIAA1239 | 6,024877494 | 0,63792858  | 0,305542779 |
| SLC45A4  | 0           | 0,222698664 | 0,488696003 |
| LPXN     | 0           | 0,47582498  | 1,111590826 |
| KCNQ5    | 0,402623091 | 2,024204399 | 1,45540379  |
| CXCL11   | 0           | 1,062523864 | 2,517743007 |
| ABHD12B  | 0,092913021 | 0,333426492 | 0,055037626 |
| AGPS     | 0           | 2,493120068 | 1,455614425 |
| C15orf62 | 0           | 0,686815157 | 0,300107773 |
| ATP13A4  | 0,51765826  | 0,430278593 | 0,453149714 |



|           |             |             |             |
|-----------|-------------|-------------|-------------|
| TP53INP2  | 0,376554843 | 0,292139559 | 0,416111636 |
| SLC26A9   | 0,658837785 | 0,310611021 | 0,443826666 |
| LRMP      | 0           | 0,401530944 | 0,264670348 |
| PDZD2     | 2,415738545 | 0,473149785 | 0,475843692 |
| TNFRSF11A | 0           | 0,663325142 | 0,404639435 |
| C6orf105  | 0           | 0,604780548 | 0,421008537 |
| PKIB      | 0           | 2,243787693 | 2,476114124 |
| SEMA4G    | 0           | 0,489186613 | 0,562677065 |
| PSG4      | 2,664849661 | 0,823657291 | 0,370283249 |
| PLXNC1    | 0           | 1,236342682 | 3,155325257 |
| STAU1     | 2,409950998 | 0,909417564 | 0,29088942  |
| SNX10     | 0           | 1,36161901  | 2,048281842 |
| PCSK6     | 0,805246182 | 0,29024818  | 0,306768667 |
| RASEF     | 0           | 0,495179534 | 0,950522224 |
| FAM43A    | 0           | 0,407471159 | 0,394750053 |
| GSTM3     | 0           | 1,221116274 | 2,055442945 |
| CAMK1D    | 0,377459148 | 0,375129664 | 0,306028714 |
| TSHZ2     | 1,207869272 | 0,46535874  | 0,747517997 |
| LYPD5     | 1,506219374 | 0,759833247 | 0,188697747 |
| GGCT      | 0,460140675 | 0,566381482 | 0,279496341 |
| AURKA     | 0           | 1,501866177 | 2,037284153 |
| NFATC2    | 0           | 0,383136788 | 0,186601598 |
| CLDN7     | 5,422389745 | 2,847508299 | 2,125012707 |
| CELF2     | 0           | 2,155081491 | 2,017241611 |
| GLRX      | 0           | 0,443262991 | 0,149751355 |
| METTL7A   | 0,753109687 | 0,119978126 | 0,140868922 |
| KIF14     | 0,054903149 | 1,449702921 | 2,188887842 |
| KRT15     | 0,753109687 | 1,893736744 | 2,509621411 |
| PERP      | 1,207869272 | 0,498565987 | 0,826577182 |
| C10orf99  | 1,207869272 | 0,270173463 | 0,184403126 |
| GNG11     | 0           | 1,732259517 | 2,13875153  |
| CEBPA     | 0           | 0,769418339 | 0,438637081 |
| VASN      | 0           | 0,488858688 | 0,331444157 |
| C3orf57   | 0           | 0,366037574 | 0,347338382 |
| BUB1B     | 0,603934636 | 1,450731992 | 2,109878859 |
| VGLL1     | 0           | 2,041614835 | 2,512658466 |
| SLC39A2   | 0,185826042 | 0,326259074 | 0,292851138 |
| CBX6      | 0           | 2,221170759 | 1,668990739 |
| ALOX12B   | 5,746529569 | 0,419122081 | 0,071249422 |
| IL1F7     | 0           | 0,56571009  | 0,151606439 |
| DKK1      | 0           | 1,995504258 | 2,228603116 |
| LOC283404 | 0           | 0,436804946 | 0,221604726 |
| ELOVL7    | 0,433594098 | 0,374942013 | 0,252950546 |
| PLAGL1    | 6,777987181 | 0,472736933 | 0,493340833 |
| LY6G6C    | 3,012438747 | 0,353213071 | 0,15058679  |
| KRT7      | 0           | 1,507905753 | 2,244121308 |
| ADORA2B   | 0           | 2,29071645  | 2,824310848 |
| C5orf4    | 0,020825332 | 0,264063888 | 0,429934914 |

|           |             |             |             |
|-----------|-------------|-------------|-------------|
| DLGAP5    | 0           | 1,383516125 | 2,113422756 |
| NHEDC2    | 0           | 1,494684691 | 2,042533767 |
| FAM195A   | 0           | 2,570371391 | 1,867830601 |
| TGM5      | 0           | 0,191556516 | 0,254009778 |
| FAM169A   | 0,301967318 | 2,175372899 | 1,541147704 |
| SPINK5    | 0,603934636 | 0,595986457 | 0,460249032 |
| MUC15     | 0,14891539  | 0,347999973 | 0,307732495 |
| ANXA9     | 2,243185792 | 0,218226011 | 0,098033085 |
| SORCS2    | 0           | 0,532312313 | 0,438300334 |
| GUCY1B3   | 0,603934636 | 2,369187216 | 1,255555494 |
| PTPRO     | 0           | 0,44824045  | 0,858135455 |
| KLF4      | 0,645522589 | 0,416912175 | 0,512545854 |
| RBBP6     | 1,537288165 | 0,388853609 | 0,347526714 |
| PLAC2     | 466,9280058 | 0,340265147 | 0,749962477 |
| ASAP3     | 0,334715416 | 0,394932748 | 0,622434321 |
| FILIP1L   | 0,381947851 | 0,526512913 | 0,416894112 |
| EMP1      | 0,245074925 | 2,12060161  | 2,679863866 |
| LOC402778 | 0           | 0,467541007 | 0,570591228 |
| CYP26B1   | 2,013115454 | 0,251798573 | 0,326567756 |
| TSPAN1    | 0           | 2,209791488 | 1,933797545 |
| APCDD1    | 7,229852993 | 0,412828869 | 0,745768153 |
| GAS1      | 0           | 0,88774095  | 2,102951674 |
| LYNX1     | 0           | 0,317389546 | 0,069009161 |
| TM7SF2    | 0,073474116 | 0,428364761 | 0,245370053 |
| NKPD1     | 1,004146249 | 0,551146206 | 0,447856879 |
| KRT19     | 1,207869272 | 5,860005527 | 5,263937345 |
| FMO2      | 0           | 0,476462362 | 0,259317806 |
| RPTN      | 1,506219374 | 0,04046762  | 0,016080807 |
| CDSN      | 13,55597436 | 0,647731852 | 0,105075545 |
| LRRC20    | 0           | 0,682962935 | 0,479948145 |
| CRIP1     | 0           | 2,124518678 | 1,06777169  |
| KAZALD1   | 0           | 0,466197296 | 0,571956812 |
| CARD14    | 0           | 0,481341232 | 0,475951174 |
| NDUFA4L2  | 2,415738545 | 0,312924666 | 0,599734782 |
| SLC19A3   | 0           | 0,076381517 | 0,127977884 |
| DNASE1L2  | 0           | 0,268416463 | 0,254276093 |
| TMEM64    | 0           | 2,004276969 | 1,853477456 |
| SLC13A5   | 0           | 0,39579639  | 0,630487566 |
| POU2F3    | 0,201311545 | 0,450494717 | 0,241383548 |
| ARG2      | 0,603934636 | 0,842750672 | 0,420208288 |
| SLC39A8   | 0           | 2,208477524 | 2,557383928 |
| EPS8L1    | 4,518658121 | 0,762619057 | 0,44532062  |
| FBXL16    | 0           | 2,795430489 | 1,501880352 |
| ADAP2     | 1,207869272 | 0,546417326 | 0,252116994 |
| MAPK14    | 0,483147709 | 0,61686628  | 0,49275674  |
| C4orf19   | 0           | 2,233269497 | 0,834916629 |
| SLC46A2   | 0           | 0,071808579 | 0,050406248 |
| CCL5      | 0           | 0,34675748  | 0,87169655  |

|           |             |             |             |
|-----------|-------------|-------------|-------------|
| PITX1     | 0           | 2,269681345 | 0,442980796 |
| ATP6V1C2  | 0,502073125 | 0,566345139 | 0,159965335 |
| FHDC1     | 0           | 0,45844523  | 0,505043417 |
| MAP1LC3A  | 0           | 0,355939267 | 0,387249709 |
| ZNF107    | 1,506219374 | 0,245426586 | 0,506041298 |
| KRT24     | 1,834171858 | 1,300058087 | 3,18331934  |
| CCDC90A   | 1,004146249 | 0,477930115 | 0,608433614 |
| SMPD1     | 0           | 0,452991065 | 0,648272398 |
| TM7SF3    | 0,201311545 | 2,095931885 | 1,400234726 |
| NDRG2     | 0,177202279 | 0,468575713 | 0,423619793 |
| FBLN1     | 0,241573854 | 1,179135718 | 2,120780513 |
| PSORS1C2  | 0,402623091 | 0,4943948   | 0,133304567 |
| SDR9C7    | 0           | 0,540462698 | 0,196246882 |
| NTM       | 0           | 2,631362836 | 1,444823712 |
| MAP3K8    | 0,502073125 | 0,85338166  | 0,377344684 |
| FA2H      | 0           | 0,442317313 | 0,307593591 |
| GRHL1     | 0,207063304 | 0,435278261 | 0,624699207 |
| LMTK3     | 0           | 0,449997252 | 1,073982586 |
| SLC16A9   | 0           | 2,152365146 | 1,513003623 |
| ELOVL1    | 3,220984726 | 0,695088981 | 0,46290495  |
| FLG       | 1,022043231 | 0,472433094 | 0,033702833 |
| EGR2      | 0           | 0,406049721 | 0,250292832 |
| GAS7      | 1,207869272 | 0,323787144 | 0,205221469 |
| EGF       | 0           | 0,636518882 | 0,413069904 |
| LOC643923 | 0           | 0,479295641 | 0,588655967 |
| FST       | 0           | 2,495129699 | 2,197025607 |
| BEX2      | 0           | 0,365121413 | 0,49177799  |
| PAWR      | 0,037165208 | 0,657093235 | 0,484674033 |
| LOC284242 | 0           | 0,413646826 | 0,190414979 |
| SH3GL3    | 0           | 0,448026203 | 0,264422396 |
| KRT77     | 0,571078435 | 0,315906552 | 0,141561418 |
| ZNF575    | 0           | 2,191870965 | 1,268504385 |
| CAT       | 0,483147709 | 0,462162213 | 0,698350889 |
| MLANA     | 0,241573854 | 1,330565737 | 2,115609583 |
| HMMR      | 0,452950977 | 1,732034559 | 2,105919305 |
| PCOTH     | 0           | 0,366625187 | 0,49755382  |
| KIF4A     | 0           | 1,337476771 | 2,107317324 |
| ANKRD22   | 0,278739063 | 0,600144982 | 0,42275315  |
| C14orf34  | 1,342076969 | 2,117228784 | 1,466522934 |
| GBAP1     | 0,751111985 | 0,73956952  | 0,485751934 |
| ELF5      | 0,51765826  | 0,088569925 | 0,076343752 |
| RARRES1   | 0           | 0,395045088 | 2,281980425 |
| ATP12A    | 2,008292498 | 0,890872722 | 0,414631781 |
| TPM2      | 0,602487749 | 1,383501135 | 2,006672302 |
| IL8       | 0           | 1,150456564 | 2,636549379 |
| UPK1B     | 0,603934636 | 2,252517155 | 1,978161387 |
| DNAJB4    | 0           | 2,274378739 | 1,505337232 |
| DUOXA1    | 1,506219374 | 0,639065003 | 0,490677631 |

|              |             |             |             |
|--------------|-------------|-------------|-------------|
| SCNN1A       | 1,305804619 | 0,487132152 | 0,184710758 |
| NDRG4        | 0           | 0,531302481 | 0,198451488 |
| ZRANB1       | 0,223679495 | 0,539263885 | 0,496625958 |
| HSPA2        | 0,502073125 | 0,292528575 | 0,501288752 |
| AVPI1        | 0,814959275 | 0,620686133 | 0,340001697 |
| FABP4        | 0           | 0,293800542 | 0,468019439 |
| FNTB         | 0,603934636 | 0,48796278  | 0,679400137 |
| GCNT3        | 0           | 0,425394982 | 0,995222422 |
| C5orf46      | 0           | 0,151236137 | 0,17748188  |
| HIST1H4H     | 1,811803909 | 0,388041883 | 0,496282686 |
| LOC100129122 | 0           | 0,283691228 | 0,384400262 |
| NFKBIZ       | 0,753109687 | 1,919786693 | 2,005604574 |
| NYNRIN       | 1,691016981 | 0,48526766  | 0,943252897 |
| CYB561D1     | 0,905901954 | 0,521848408 | 0,476834649 |
| MAF          | 2,008292498 | 0,279111613 | 0,707348104 |
| TMPRSS13     | 0,690211013 | 0,63316266  | 0,366517017 |
| HS6ST2       | 0           | 2,301449018 | 1,164884577 |
| ETV7         | 0           | 0,286476372 | 0,494783086 |
| FRMPD1       | 0           | 0,293607571 | 0,471021491 |
| UPP1         | 0,623263189 | 2,124289886 | 0,786264083 |
| APOBEC3G     | 0           | 1,454649276 | 2,173478927 |
| FGD3         | 0           | 0,615795896 | 0,451932739 |
| SLC5A1       | 0,20082925  | 0,634230966 | 0,465339129 |
| ASPHD2       | 0           | 0,49765546  | 0,776876166 |
| EPHB6        | 3,019673181 | 0,372655803 | 0,227442657 |
| ST3GAL6      | 0,226475489 | 0,47350584  | 0,468368041 |
| XAF1         | 0           | 0,479710294 | 1,880038044 |
| FLJ22536     | 0           | 0,34386405  | 0,562276107 |
| TNNT2        | 0,602487749 | 0,628460159 | 0,295800996 |
| SDR16C5      | 0,097935346 | 0,418953743 | 0,33267954  |
| HS3ST6       | 0           | 0,453270817 | 0,106642058 |
| CASP14       | 4,293187523 | 0,069782198 | 0,162310023 |
| PCSK5        | 0           | 0,45064619  | 0,828369577 |
| MXD1         | 1,12966453  | 1,133058377 | 0,478602048 |
| LOR          | 0           | 0,154378686 | 0,002120783 |
| SH3BGRL2     | 0,268415394 | 0,397412365 | 0,379354824 |
| KRT10        | 3,824919363 | 0,280613394 | 0,535324037 |
| C12orf24     | 0,502073125 | 2,392619274 | 1,792711282 |
| EGLN3        | 0,073204198 | 0,177654691 | 0,382357896 |
| WFDC12       | 0,016109298 | 0,840332849 | 0,167199589 |
| XKRX         | 0           | 0,560290064 | 0,291848335 |
| ITPR1        | 0           | 0,403872189 | 0,512179323 |
| ARG1         | 0,092913021 | 0,265709601 | 0,003021171 |
| RND2         | 0,603934636 | 0,328181922 | 0,705420914 |
| DUSP1        | 2,628891946 | 0,755426707 | 0,477180981 |
| GPX3         | 7,531096868 | 0,574308249 | 0,088614385 |
| KIF20A       | 0           | 1,318670256 | 2,21843384  |
| TCP11L2      | 0,238089616 | 0,716477441 | 0,356727695 |

|          |             |             |             |
|----------|-------------|-------------|-------------|
| MALAT1   | 1,213967853 | 1,00170275  | 0,46107506  |
| CPM      | 3,012438747 | 0,208071908 | 0,144673915 |
| NEFL     | 0           | 1,90539184  | 2,008567311 |
| CBS      | 0,452950977 | 2,743914506 | 1,151552755 |
| SLURP1   | 0           | 0,123373645 | 0,059388269 |
| CIDEA    | 0           | 0,456736278 | 0,212436261 |
| ULK3     | 0           | 0,631545435 | 0,431533706 |
| GNG4     | 0           | 0,223727862 | 0,941798404 |
| H19      | 6,024877494 | 0,318837958 | 1,11125454  |
| IL20RA   | 0,07549183  | 0,416941859 | 0,583205405 |
| CHRNA9   | 0           | 0,207744606 | 0,110939469 |
| PPP2R2C  | 0           | 0,667718209 | 0,329844356 |
| GBP2     | 0           | 0,443587472 | 0,429488559 |
| CGN      | 0           | 0,48593935  | 0,537566384 |
| TGM3     | 0           | 0,135560949 | 0,204885415 |
| TCEA3    | 1,207869272 | 0,829446158 | 0,345775402 |
| SPRR2G   | 0,847248398 | 1,168628608 | 0,093002132 |
| VWF      | 0           | 0,366773877 | 0,590823601 |
| OVOL1    | 0,520948054 | 0,424066681 | 0,616216079 |
| S100A7   | 3,623607817 | 0,822876742 | 0,465882553 |
| LCE2B    | 0           | 0,706986741 | 0,003994526 |
| 03. Mär  | 0,044735899 | 0,505451901 | 0,107733207 |
| CTSA     | 0,376554843 | 0,464556352 | 0,526969097 |
| CCND1    | 4,658924336 | 1,688013737 | 2,090783921 |
| CYP2E1   | 0           | 2,03334945  | 1,020052113 |
| SGK2     | 0           | 0,371127869 | 0,645397055 |
| HPSE     | 0           | 0,556963424 | 0,267817768 |
| SBSN     | 3,892023211 | 0,769368285 | 0,485115428 |
| SPINK7   | 0           | 0,726310537 | 0,290136388 |
| CTH      | 0           | 3,499557905 | 0,797612912 |
| SPRR4    | 0,939453879 | 0,354388702 | 0,160250132 |
| USP18    | 3,623607817 | 0,76661199  | 2,241958075 |
| PRSS8    | 0,172552753 | 0,81350068  | 0,469992139 |
| SNTB1    | 0           | 0,257670489 | 0,42639237  |
| GCNT2    | 0           | 1,879164466 | 3,861152432 |
| C9orf169 | 1,509836591 | 0,626454037 | 0,306877436 |
| HSD11B1  | 0           | 0,202110491 | 0,278958835 |
| KITLG    | 0,268415394 | 2,277121481 | 1,486343501 |
| C1orf210 | 0           | 0,844906586 | 0,423560075 |
| EREG     | 0,127144134 | 1,116756528 | 0,439083168 |
| CNFN     | 1,095432272 | 0,765338085 | 0,102643115 |
| SPARC    | 0           | 1,179594153 | 2,193941742 |
| VIPR1    | 4,518658121 | 0,424435487 | 0,675171393 |
| KCTD12   | 0           | 2,166453961 | 1,133826206 |
| IGFBP3   | 0,448773564 | 0,327560064 | 1,10653729  |
| GSTT2    | 0,161380647 | 0,140258615 | 0,24873816  |
| CTSH     | 0           | 0,445486653 | 0,189917206 |
| SCNN1B   | 0           | 0,450481262 | 0,404357267 |

|              |             |             |             |
|--------------|-------------|-------------|-------------|
| GPT2         | 0,345105506 | 0,508859891 | 0,440465671 |
| USP2         | 0           | 0,457781816 | 0,137159015 |
| ZNF662       | 0,154389305 | 0,341758736 | 0,169061475 |
| GPRIN2       | 0           | 0,41737661  | 0,607127884 |
| CSNK2A2      | 0,13727569  | 0,368503134 | 0,370886503 |
| CEACAM1      | 0           | 2,467067698 | 1,360513325 |
| ABCG4        | 0           | 0,394410589 | 0,378369939 |
| PTGS1        | 0           | 0,490502118 | 0,419044495 |
| IDE          | 0,690211013 | 0,462869425 | 0,310548902 |
| DCN          | 0,177627834 | 1,178392811 | 2,56495997  |
| NOD2         | 4,518658121 | 0,427954445 | 0,580223491 |
| KCNK7        | 0           | 0,729486276 | 0,475723592 |
| GPR1         | 0,547716136 | 0,381716559 | 0,479001644 |
| CLMN         | 0           | 3,316951758 | 1,675882096 |
| GPR68        | 0           | 0,499722634 | 0,736716716 |
| LOC100130476 | 0           | 0,447388687 | 0,359357508 |
| GPX2         | 0           | 2,878554341 | 1,818235271 |
| S100A12      | 0,056179966 | 0,488050723 | 0,615668382 |
| EPST11       | 1,207869272 | 0,423228476 | 1,253096579 |
| ARHGAP26     | 3,012438747 | 0,459544852 | 0,686265775 |
| PRSS27       | 11,38032416 | 0,405840875 | 0,381512002 |
| CYB5A        | 0           | 0,704689541 | 0,408923255 |
| RBP7         | 0           | 0,701180325 | 0,336395486 |
| PRICKLE1     | 0           | 0,481068594 | 0,900292056 |
| WNT5B        | 0           | 1,021776662 | 2,334545992 |
| PEG10        | 0           | 1,730783215 | 2,021670809 |
| DSC1         | 0,504256104 | 0,399154768 | 0,191672809 |
| ZNF91        | 0,143449464 | 0,352674774 | 0,327760781 |
| KLK12        | 0           | 0,931832069 | 0,445142242 |
| HSDL2        | 0,658837785 | 0,427277212 | 0,411967249 |
| DSG1         | 0,320851464 | 0,454767336 | 0,437754701 |
| GXYLT2       | 1,207869272 | 0,912554933 | 2,366785444 |
| BSPRY        | 0           | 0,664061948 | 0,498962711 |
| BCL6         | 7,247215635 | 0,486981122 | 0,668932977 |
| ACPP         | 0,215690942 | 0,386714332 | 0,256226483 |
| G0S2         | 0           | 0,949143018 | 0,470704006 |
| HPGD         | 0           | 0,40305599  | 0,036780564 |
| CTSD         | 0,602487749 | 0,225946477 | 0,327846208 |
| POR          | 1,147475809 | 0,495113984 | 0,450664233 |
| RAET1E       | 0,4016585   | 0,552344916 | 0,417328288 |
| LOC100132815 | 0           | 0,383917786 | 0,389865334 |
| FAM89A       | 0,013458153 | 0,663614497 | 0,491940622 |
| MFAP3L       | 0,105541975 | 0,358498338 | 0,245483011 |
| PSAPL1       | 0           | 0,175703404 | 0,080168121 |
| SLC7A11      | 1,090028368 | 2,108701604 | 1,002046111 |
| SERPINB3     | 0,307888246 | 0,630385193 | 0,438645009 |
| DNER         | 0           | 1,184138923 | 2,005977732 |
| GCHFR        | 0           | 2,639218437 | 0,979687034 |

|           |             |             |             |
|-----------|-------------|-------------|-------------|
| ZBTB7C    | 0,483147709 | 0,130684649 | 0,314585445 |
| PSG1      | 0,677798718 | 0,964469411 | 0,462912498 |
| GOLSYN    | 0           | 2,154935962 | 1,249820912 |
| MME       | 0,172552753 | 2,028164307 | 0,650562847 |
| LRAT      | 0           | 1,344624258 | 2,220701866 |
| AMACR     | 0,134207697 | 0,396848392 | 0,912366807 |
| MAMDC2    | 0           | 0,493784473 | 1,209801428 |
| LASS3     | 0           | 0,564961395 | 0,395180752 |
| POPDC3    | 0           | 2,099237069 | 2,30566404  |
| SERPINA3  | 0           | 0,768144219 | 2,795090911 |
| PGLYRP4   | 0,463452115 | 0,481532019 | 0,502482329 |
| MFI2      | 0           | 1,906314931 | 3,183023753 |
| FZD10     | 0           | 0,348246009 | 0,520439309 |
| KRT31     | 0           | 1,700727376 | 2,638528089 |
| KDM3A     | 0,738142333 | 0,457151813 | 0,644740611 |
| SPTLC3    | 2,61705009  | 0,473468936 | 0,32262841  |
| GGT6      | 0           | 0,486568521 | 0,448573143 |
| KRT79     | 0,158549408 | 0,144263886 | 0,525706271 |
| NRG1      | 0,215174196 | 2,481566224 | 2,054620542 |
| CCNA2     | 0,061417082 | 1,506518716 | 2,143562371 |
| LCE1E     | 0           | 0,919451793 | 0,149550212 |
| IGFL2     | 0,430348392 | 0,963154616 | 0,39682622  |
| TGFBI     | 0,265803419 | 0,208091451 | 1,212754182 |
| NELL2     | 0           | 0,538649976 | 0,431182435 |
| OTUB2     | 0,201311545 | 0,487639294 | 0,314576893 |
| GTSE1     | 0           | 1,41010888  | 2,370446678 |
| ARRDC4    | 0           | 1,398716256 | 0,445668878 |
| ABCA12    | 0,805246182 | 0,465848935 | 0,341183083 |
| TRNP1     | 1,204975499 | 2,197563128 | 1,187886296 |
| GABARAPL2 | 1,207869272 | 0,950629455 | 0,400157847 |
| TRIM25    | 0,523902391 | 0,492771148 | 0,710180841 |
| CYFIP2    | 0           | 0,293016411 | 0,168359234 |
| RUNDC3A   | 0           | 0,315470644 | 0,45133213  |
| CDKN3     | 0           | 1,473708619 | 2,267739313 |
| FAM3D     | 0           | 0,213206418 | 0,451473487 |
| LIN7B     | 0           | 0,492166259 | 0,601692832 |
| ACOT8     | 0,402623091 | 0,461637897 | 0,666026852 |
| BHLHE41   | 0           | 0,913283204 | 3,25659466  |
| PBK       | 0           | 1,558070004 | 2,078493173 |
| GAL       | 0           | 1,831328602 | 2,477676114 |
| KRT78     | 4,106755526 | 0,317641032 | 0,117669811 |
| SMAP2     | 0,402623091 | 0,474112111 | 0,513513481 |
| SLC30A2   | 0           | 0,352187037 | 0,627842037 |
| SLITRK6   | 0           | 0,677940994 | 2,069416416 |
| MAP4K5    | 0,765063809 | 0,49541954  | 0,746820532 |
| PRR9      | 0           | 1,126924341 | 0,360014179 |
| GCNT1     | 0           | 0,22058104  | 0,378716184 |
| PGLYRP3   | 3,623607817 | 0,37267273  | 0,47765272  |

|           |             |             |             |
|-----------|-------------|-------------|-------------|
| EGR3      | 1,207869272 | 0,660009761 | 0,236106729 |
| OASL      | 0           | 0,331247339 | 0,446727914 |
| DAPL1     | 0,056838467 | 0,395760514 | 1,229734401 |
| ATP10B    | 0,568409069 | 0,178408316 | 0,138542538 |
| ARL5A     | 0,334715416 | 0,399758747 | 0,370178835 |
| AMPD3     | 0,241573854 | 0,964251055 | 0,4445475   |
| ALDH3B2   | 0,430348392 | 0,60014662  | 0,364526628 |
| SAMD5     | 0           | 2,121678138 | 1,394157935 |
| GCLC      | 0,126404924 | 2,040017363 | 1,656789769 |
| ALDH5A1   | 0           | 0,206991707 | 0,270923463 |
| CTGF      | 0           | 1,183759543 | 3,783381636 |
| PYDC1     | 0           | 0,100119722 | 0,106429146 |
| CENPM     | 0           | 0,458407986 | 0,788959734 |
| ELOVL4    | 0,334715416 | 0,437904368 | 0,266480571 |
| SOX2      | 0           | 0,702883721 | 0,45920054  |
| FLVCR2    | 1,506219374 | 0,40352292  | 0,210688487 |
| CYP4B1    | 0,502073125 | 0,154194053 | 0,2850449   |
| CYP1B1    | 0           | 1,407778137 | 2,93213355  |
| CSF2RB    | 0           | 0,322565429 | 0,399467485 |
| ELMOD1    | 0           | 0,511531602 | 0,025431639 |
| GPR110    | 0,301967318 | 2,728843147 | 1,854006413 |
| SLC16A10  | 0           | 0,446482381 | 0,097740107 |
| CHAC1     | 0           | 2,214262837 | 0,76215098  |
| EPCAM     | 0           | 3,858743174 | 2,119805283 |
| C1orf68   | 0           | 1,127520384 | 0,363518215 |
| FCHSD1    | 1,207869272 | 0,983594308 | 0,199049018 |
| ZNF846    | 0,109806297 | 1,281960839 | 0,367685023 |
| SNX21     | 2,415738545 | 0,431489359 | 0,460409558 |
| RHBG      | 0           | 0,256748146 | 0,623052613 |
| NLRX1     | 0,603934636 | 0,407797652 | 0,525254466 |
| PSG7      | 1,204975499 | 1,001883956 | 0,293078068 |
| SLC22A3   | 0           | 0,511622352 | 0,403270836 |
| DHRS9     | 0           | 2,106480744 | 0,164056274 |
| FGD2      | 0           | 0,486658866 | 0,508546729 |
| MX2       | 0           | 0,362356618 | 1,611498661 |
| FAM84B    | 0           | 2,088679804 | 1,645859722 |
| LOC154761 | 0           | 0,472423592 | 0,702868205 |
| EFEMP1    | 0,089471798 | 1,952762272 | 2,577749437 |
| LOC643008 | 0           | 0,472077085 | 0,35065759  |
| FANCD2    | 1,207869272 | 1,491688103 | 2,137545722 |
| HOPX      | 0,167357708 | 0,93668651  | 0,355695767 |
| DUOX1     | 7,093807372 | 0,525027552 | 0,49220181  |
| MMP9      | 0           | 0,331849171 | 0,844622299 |
| PSPH      | 0,402623091 | 2,278750702 | 1,303392196 |
| DEPDC1    | 0           | 1,667295476 | 2,309102332 |
| ACER1     | 0,603934636 | 0,240080793 | 0,138956465 |
| GRAMD1C   | 1,207869272 | 0,796396787 | 0,27627007  |
| AGPAT9    | 0           | 3,532950359 | 0,918039395 |



|        |             |             |             |
|--------|-------------|-------------|-------------|
| EEF1A2 | 0           | 0,474534773 | 0,769997691 |
| KRT2   | 0           | 0,022960811 | 0,005251152 |
| CRCT1  | 0,309913826 | 1,182332375 | 0,45836249  |

**Table S8.** Differentially expressed genes in STAU1- and TINCR- deficient human epidermis. Table shows differentially expressed transcripts based on Affymetrix transcript profiling of STAU1- and TINCR- deficient versus normal human epidermal tissue. Enrichment scores based on RNA interactome analysis with high throughput sequencing (RIA-Seq) are included for all 672 genes showing differential expression in STAU1- or TINCR- deficient tissue.
